# Supplementary material for: Ecomorphospace occupation of large herbivorous dinosaurs from Late Jurassic through to Late Cretaceous time in North America
Source: PeerJ journal article supplement (doi:10.7717/peerj.13174), 2022-04-11
Supplement: Supplementary_File_1_ecomorph_occ_Late_J-K_NA_PeerJ.pdf [file Supplementary_File_1_ecomorph_occ_Late_J-K_NA_PeerJ.pdf]

## 1 **Complete list of institutional abbreviations**

2 AMNH, American Museum of Natural History, New York, New York; CEUM, College of  
3 Eastern Utah Prehistoric Museum, Price, Utah; CM, Carnegie Museum of Natural History,  
4 Pittsburgh, Pennsylvania; CCM, Carter County Museum, Ekalaka, Montana; CMN, Canadian  
5 Museum of Nature, Ottawa, Ontario; DINO, DNM, Dinosaur National Monument, Jensen, Utah;  
6 DMNH, Denver Museum of Nature and Science, Denver, Colorado; FMNH, Field Museum of  
7 Natural History, Chicago, Illinois; FWMSH, Fort Worth Museum of Science and History, Fort  
8 Worth, Texas; GMNH-PV, Gunma Museum of Natural History Vertebrate Paleontology,  
9 Gunma, Japan; GPDM, Great Plains Dinosaur Museum, Malta, Montana; HMNS, Hayashibara  
10 Museum of Natural Sciences, Okayama, Japan; LL, cast housed in the University of Manchester  
11 Museum; MOR, Museum of the Rockies, Bozeman, Montana; MSC, McWane Science Center,  
12 Birmingham, Alabama; NCSM, North Carolina Museum of Natural Sciences, Raleigh, North  
13 Carolina; NHMUK, Natural History Museum, London, U.K.; NMMNH, New Mexico Museum  
14 of Natural History, Albuquerque, New Mexico; NSM PV, National Museum of Nature and  
15 Science, Tokyo, Japan; OMNH, Sam Noble Oklahoma Museum of Natural History, University  
16 of Oklahoma, Norman, Oklahoma; OTM, Old Trail Museum, Choteau, Montana; RAM,  
17 Raymond M. Alf Museum of Paleontology, Claremont, California; ROM, Royal Ontario  
18 Museum, Toronto, Ontario; SM, Senckenberg Museum, Frankfurt, Germany; SMA,  
19 Sauriermuseum Aathal, Aathal, Switzerland; SMU, Shuler Museum of Paleontology, Southern  
20 Methodist University, Dallas, Texas; TATE, Tate Geological Museum, Casper College, Casper,  
21 Wyoming; TMM, Texas Memorial Museum, Austin, Texas; TMP, Royal Tyrrell Museum of  
22 Palaeontology, Drumheller, Alberta; UALVP, University of Alberta, Edmonton, Alberta;  
23 UCMP, University of California Museum of Paleontology, Berkeley, California; UKMNH,

24 University of Kansas, Museum of Natural History, Lawrence, Kansas; UMMP, University of  
25 Michigan Museum of Paleontology, Ann Arbor, Michigan; USNM, Smithsonian Institution,  
26 National Museum of Natural History, Washington, D.C.; VFSMA, Verein für das  
27 Sauriermuseum, Aathal, Switzerland; YPM, Peabody Museum of Natural History, Yale  
28 University, New Haven, Connecticut; YPM PU, Peabody Museum of Natural History, Yale  
29 University, New Haven, Connecticut, Princeton University Collection.

30

### 31 **Software used**

32 Harrington B et al. 2004. Inkscape. Available at <http://www.inkscape.org/> (accessed 22  
33 November 2021).

34 RStudio Team. 2015. RStudio: Integrated Development for R. RStudio, Inc., Boston, MA.  
35 Available at <http://www.rstudio.com/> (accessed 22 November 2021).

36 Schneider CA Rasband WS, Eliceiri KW. 2012. NIH Image to ImageJ: 25 years of image  
37 analysis. *Nature methods* 9(7): 671-675. PMID 22930834.

38

### 39 **R packages used**

#### 40 ***Packages used to import datasets from excel and manipulate data frames***

41 Bryan J. 2019. readxl: Read Excel Files. R package version 1.3.1. Available at [https://CRAN.R-](https://CRAN.R-project.org/package=readxl)  
42 [project.org/package=readxl](https://CRAN.R-project.org/package=readxl) (accessed 22 November 2021).

43 Dragulescu A and Arendt C. 2020. xlsx: Read, Write, Format Excel 2007 and Excel  
44 97/2000/XP/2003 Files. R package version 0.6.5. Available at [https://CRAN.R-](https://CRAN.R-project.org/package=xlsx)  
45 [project.org/package=xlsx](https://CRAN.R-project.org/package=xlsx) (accessed 22 November 2021).

46 Henry L, Wickham H, RStudio. 2020. purrr: Functional Programming Tools. R package version  
47 0.3.4. Available at <https://CRAN.R-project.org/package=purrr> (accessed 22 November  
48 2021).

49 Wickham H. 2011. plyr: Tools for Splitting, Applying and Combining Data. R package version  
50 1.8.6. Available at <https://CRAN.R-project.org/package=plyr> (accessed 22 November  
51 2021).

52 Wickham H. 2020. reshape2: Flexibly Reshape Data: A Reboot of the Reshape Package. R  
53 package version 1.4.4. Available at <https://CRAN.R-project.org/package=reshape2>  
54 (accessed 22 November 2021).

55 Wickham H, François R, Henry L, Müller K. 2018. dplyr: A Grammar of Data Manipulation. R  
56 package version 0.7.6. Available at <https://CRAN.R-project.org/package=dplyr> (accessed  
57 22 November 2021).

58 Wickham H and RStudio. 2019. tidyverse: Easily Install and Load the ‘Tidyverse’. R package  
59 version 1.3.0. AVAILABLE AT <https://CRAN.R-project.org/package=tidyverse>  
60 (accessed 22 November 2021).

61

62 ***Packages used for constructing, combining and exporting plots***

63 Bivand R, Rowlingson B, Diggle P, Petris G, Elgen S. 2021. splancs: Spatial and Space-Time  
64 Point Pattern Analysis. R package version 2.01-42. AVAILABLE AT [https://CRAN.R-](https://CRAN.R-project.org/package=splancs)  
65 [project.org/package=splancs](https://CRAN.R-project.org/package=splancs) (accessed 22 November 2021).

66 Edwards SM, Auguie B, Jackman S, Wickham H, Chang W. 2020. lemon: Freshing Up your  
67 ‘ggplot2’ Plots. R package version 0.4.5. AVAILABLE AT [https://CRAN.R-](https://CRAN.R-project.org/package=lemon)  
68 [project.org/package=lemon](https://CRAN.R-project.org/package=lemon) (accessed 22 November 2021).

69 Ihaka R, Murrell P, Hornik K, Fisher JC, Stauffer R, Wilke CO, McWhite CD, Zeileis A. 2021.  
70 colorspace: A Toolbox for Manipulating and Assessing Colors and Palettes. R package  
71 version 2.0-2. AVAILABLE AT <https://CRAN.R-project.org/package=colorspace>  
72 (accessed 22 November 2021).

73 Kassambara, A. 2020. ggpubr: ‘ggplot2’ Based Publication Ready Plots. R package version  
74 0.4.0. AVAILABLE AT <https://CRAN.R-project.org/package=ggpubr> (accessed 22  
75 November 2021).

76 Wickham H. 2016. ggplot2: Elegant Graphics for Data Analysis. R package version 3.3.0.  
77 AVAILABLE AT <https://CRAN.R-project.org/package=ggplot2> (accessed 22 November  
78 2021).

79

## 80 ***Analysis-specific packages***

81 *Used to conduct Bayesian PCA imputation for missing data and standard PCA*

82 Stacklies W, Redestig H, Scholz M, Walther D, Selbig J. 2007. pcaMethods – a Bioconductor  
83 package providing PCA methods for incomplete data. *Bioinformatics* 23: 1164-1167. R  
84 package version 1.80.0.

85

86 *Used to run omnibus and pairwise NPMANOVA.*

87 Oksanen J, Guillaume Blanchet F, Friendly M, Kindt R, Legendre P, Dan McGlinn D, Peter R,  
88 Minchin PR, O'Hara RB, Simpson GL, Solymos P, Stevens MHH, Szoecs E, Wagner H.  
89 2019. vegan: Community Ecology Package. R package version 2.5-6. Available from  
90 <https://CRAN.R-project.org/package=vegan> (accessed 22 November 2021).

91

92 *Used to compute the harmonic mean p-value.*

93 Wilson DJ. 2019. harmonicmeanp: Harmonic Mean p-Values and Model Averaging by Mean  
94 Maximum Likelihood. R package version 3.0. Available from [https://CRAN.R-](https://CRAN.R-project.org/package=harmonicmeanp)  
95 [project.org/package=harmonicmeanp](https://CRAN.R-project.org/package=harmonicmeanp) (accessed 22 November 2021).
