# Supplementary material for: Ecomorphospace occupation of large herbivorous dinosaurs from Late Jurassic through to Late Cretaceous time in North America
Source: PeerJ journal article supplement (doi:10.7717/peerj.13174), 2022-04-11
Supplement: Supplementary_Tables_1-5__and_code_ecomorph_occ_Late_J-K_NA.zip [file Supplementary_Tables_1-5__and_code_ecomorph_occ_Late_J-K_NA.zip]

## Sheet: STable1
Supplementary Table 1: Abbreviations, descriptions and functional and ecological interpretations for measurements used in this study. Measurements are depicted in Supplementary Figure 1.
variable abbreviation	full name of variable	description of measurement	functional correlation*	ecological correlation*	comments regarding measurements between groups	measurement reference(s)
as-mq	anterior snout to middle quadrate	distance from the anterior-most tip of the snout to the middle of the quadrate	(-) bite force	(-) resistance of plant material		Mallon and Anderson (2013) and references therein
			(-) feeding height	(-) height of plant material
			(+) feeding selectivity	(+) quality of plant material
cs-mq	cropping surface to middle quadrate	distance from the distal end of the effective croppng edge to the middle of the quadrate (=jaw joint)	(-) bite force	(-) resistance of plant material	In hadrosaurs, ceratopsids, ankylosaurs and stegosaurs the distal end of the effective fropping edge is equivalent to the 'caudal beak tip' referred to in Mallon and Anderson (2013).	Mallon and Anderson (2013) and references therein; MacLaren et al. (2017)
			(+) feeding height	(+) height of plant material	In diplodocids the distal end of the effective cropping edge is the distal edge of the last most ventrally-deflected tooth in the tooth row (typically this is the third-from-last tooth).
			(+) feeding selectivity	(+) quality of plant material	In camarasaurids and brachiosaurids the distal end of the effective cropping edge is measured from the last tooth of the premaxilla. This measurement is based on the 'premaxocc-maxocc' proxies used by MacLaren et al. (2017).
mt-mq	mesial tooth row to middle qudrate	distance from the mesial end of the tooth row located distal to the end of effective cropping edge	(-) bite force	(-) resistance of plant material	In hadrosaurs, ceratopsids, ankylosaurs and stegosaurs the mesial tooth row is the beginning of the maxillary tooth row.	Mallon and Anderson (2013) and references therein; MacLaren et al. (2017)
					In sauropods this measurement is the same as 'cs-mq' as the teeth are closely spaced together. This measurement is based on the 'premaxocc-maxocc' proxies used by MacLaren et al. (2017).
dt-mq	distal tooth row to middle quadrate	distance from the end of the tooth row to the middle of the quadrate	(-) mechanical advantage	(-) resistance of plant material		Mallon and Anderson (2013) and references therein
sw	snout width	measured at the widest part of the effective cropping mechanism in dorsal or ventral view	(-) selectivity	(-) vegetation quality		Mallon and Anderson (2013) and references therein
dh	dentary height	height of the dentary at the midpoint of the maxilla	(+) bending stress resistance	(+) resistance of plant material	In hadrosaurs, ceratopsids, ankylosaurs and stegosaurs this is taken at the middle of the maxillary tooth row.	Mallon and Anderson (2013) and references therein; Button et al. (2016)
					In sauropods this measurement is taken at the middle of the maxilla as this would be where the greatest bending and torsional stresses are expected to act based on biomechanical modelling (Button et al., 2016).
ppb	paroccipital process breadth	distance between the paroccipital processes	(+) cervical musculature	(+) head movement for severing vegetation		Mallon and Anderson (2013) and references therein
oh	occiput height	measured from the ventral edge of the foramen magnum to the dorsal edge of the occiput	(+) cervical musculature	(+) head movement for severing vegetation		Mallon and Anderson (2013) and references therein
cp-jj	coronoid process to middle jaw joint	measured from the apex of the coronoid process to the middle of the jaw joint	(+) bite force	(+)vegatation mechanical resistance		Mallon and Anderson (2013) and references therein
sh	skull height	measured from the top of the orbit to the ventral edge of the middle of the maxilla	(+) bending stress resistance	(+) resistance of plant material		Mallon and Anderson (2013) and references therein
			(+) bite force	(+) resistance of plant material
qb	quarate breadth	measured from the middle of the right quadrate to the middle of the left quadrate	(+) bite force	(+) resistance of plant material		Mallon and Anderson (2013) and references therein
SSI	snout shape index	Taken following the methodology previously described by Dompierre and Churcher (1996) except that instead of using the area between the snout outline (lines a1,a2 and c) and the 26 degree line drawn from the midline (line c) I used the area of empty space between the outline of the snout and the bounding lines (stippled area) (see Supplementary Figure 1c).	(+) selectivity	(+) vegetation quality		Dompierre and Churcher (1996)
*taken directly from Mallon and Anderson (2013) Table 1.
NOTE: for measurements such as sw, ppb, and qb, measurements may have been taken only to the midline and doubled to produce a full measurement in instances where the specimen is incomplete/distorted on one side of the skull.

## Sheet: STable2
Supplementary Table 2: Raw cranial measurements for North American Late Jurassic, Early Cretaceous and Late Cretaceous taxa used in study. All measurements are in mm.
comments	references	time	group	genus	specimen ID	Ontogeny	as-mq	cs-mq	mt-mq	dt-mq	sw	dh	ppb	oh	cp-jj	sh	qb	SSI
cast	Witmer Lab (2019)	Late Jurassic	Stegosauridae	Stegosaurus	USNM 4934	adult	361.83	324.35	274.27	147.58	67.16	54.39	129.99	29.64		73.63	113.08	0.276976
cast	Witmer Lab (2019)	Late Jurassic	Stegosauridae	Stegosaurus	NSM PV 20179	adult	290.95	256.77	224.41	117.95	36.9	56.66	93.28	35.01	39.52	83.68	123.12	0.198204
	Saitta (2014)	Late Jurassic	Stegosauridae	Hesperosaurus	HMNS 14	adult	378.74	340.55	312.4	148.82	60.73	79.72			63.49	136.42		0.135766
	Saitta (2014)	Late Jurassic	Stegosauridae	Hesperosaurus	VFSMA001	adult	469.67	413.27	351.66	194.79	51.58	78.2			77.19	127.01		0.172781
	Saitta (2014)	Late Jurassic	Stegosauridae	Hesperosaurus	SMA0018	adult	329	307.25	266.54	145.54	52.94	70.27			55.83	73.05		0.102997
	Saitta (2014)	Late Jurassic	Stegosauridae	Hesperosaurus	SMA RCR-0603	adult	304.38	269.36	237.93	119.87	37.78	48.93		55.77	29.61	81.71	195.38	0.0872463
	Kilbourne and Carpenter (2005)	Late Jurassic	Ankylosauria	Gargoyleosaurus	DMNH 27726	adult	215.42	146.53	136.25	48.84	56.04	42.51	156.81	51.93	59.87	56.56	187.14	0.105387
	Lee (1994)	Early Cretaceous	Ankylosauria	Pawpawsaurus	SMU 73203	adult	198.47	154.9	144.44	53.59	74.94		142.16	33.3		83.22	160.78	0.251864
	Kinneer et al. (2016)	Early Cretaceous	Ankylosauria	Gastonia	CEUM 1307	adult	213.48	158.83	135.43	56.1	96.17		162.84	57.92		81.42	157.38	0.108932
	Ősi et al. (2018)	Early Cretaceous	Ankylosauria	Silvisaurus	UKMNH 10296	adult	246		183	64	58		160			118	166	0.180211
	Parsons and Parsons (2009); Ősi et al. (2018)	Early Cretaceous	Ankylosauria	Tatankacephalus	MOR 1073	adult	282		238	110	80		142	42.65		90	146
	Arbour and Mallon (2017)	Late Cretaceous	Ankylosauria	Ankylosaurus	CMN 8880	adult	583.81	493.33	471.9	189.52	321.9	109.62	381.9	45.18	124.28	218.27	642.86	0.0991883
	Carpenter (2004)	Late Cretaceous	Ankylosauria	Ankylosaurus	AMNH 5214	adult	445.23	329.66	303.13	121.25	179.99	107.17	390.28		95.4	135.34	469.86	0.157912
	Arbour et al. (2014)	Late Cretaceous	Ankylosauria	Ziapelta	NMMNH P-64484	adult	310.59	247.32	232.53	121.81	174.11		180.42	70.1		69.17	182.14	0.046592
	Arbour and Evans (2017)	Late Cretaceous	Ankylosauria	Zuul	ROM 75860	adult	285.86	213.13	195.45	88.89	163.64	88.68	177.89	41.91	68.56	90.12	230.07	0.117048
	Mallon and Anderson (2013); Arbour and Currie (2013)	Late Cretaceous	Ankylosauria	Euoplocephalus	AMNH 5337	adult	290	210	207	85	185	80	268	63	50	133	251	0.118478
	Mallon and Anderson (2013); Photos courtesy of J. Mallon	Late Cretaceous	Ankylosauria	Euoplocephalus	AMNH 5403	adult		213	229	104	235	69	286	50	61	104	261	0.129152
	Mallon and Anderson (2013); Ősi et al. (2018)	Late Cretaceous	Ankylosauria	Euoplocephalus	AMNH 5405	adult	278	173	184	77	180	67	250	67	45	116	225	0.157199
	Mallon and Anderson (2013)	Late Cretaceous	Ankylosauria	Euoplocephalus	CMN 8876	adult	266	199	202	84	171		285	62		103	223
	Mallon and Anderson (2013); Photos courtesy of J. Mallon	Late Cretaceous	Ankylosauria	Euoplocephalus	NHMUK R4947	adult	280	190	185	61	170		236	59		127	230	0.133634
	Mallon and Anderson (2013)	Late Cretaceous	Ankylosauria	Euoplocephalus	ROM 1930	adult	280	186	216	90	210		241	62		171	240	0.0986761
	Mallon and Anderson (2013)	Late Cretaceous	Ankylosauria	Euoplocephalus	TMP 1991.127.0001	adult	232	156	148	72	160		211	57		78	182
	Mallon and Anderson (2013); Arbour and Currie (2013)	Late Cretaceous	Ankylosauria	Euoplocephalus	TMP 1997.132.0001	adult	293	186	208	78	170	76	258	55	69	111	260	0.128583
	Mallon and Anderson (2013); Photos courtesy of J. Mallon	Late Cretaceous	Ankylosauria	Euoplocephalus	UALVP 31	adult	285	209	178	115	182	89	244	42	57	91	249	0.150146
	Mallon and Anderson (2013)	Late Cretaceous	Ankylosauria	Panoplosaurus	AMNH 5381	adult	331	229		115	132		271	65	115	105	230
	Mallon and Anderson (2013); Ősi et al. (2018)	Late Cretaceous	Ankylosauria	Panoplosaurus	CMN 2759	adult	295	213	184	84	127	56	218	47	91	94	190	0.0887804
	Mallon and Anderson (2013); Arbour and Currie (2013)	Late Cretaceous	Ankylosauria	Panoplosaurus	ROM 1215	adult	300	208	174	81	131	58	214	46	65	90	235	0.152314
	Mallon and Anderson (2013)	Late Cretaceous	Ankylosauria	Panoplosaurus	TMP 1983.025.0002	adult	334	210	220	104	159		178	37			140
	Mallon and Anderson (2013); Photos courtesy of J. Mallon	Late Cretaceous	Ankylosauria	Panoplosaurus	TMP 1998.074.0001	adult	342	255	259	115	154		256	70		112	254	0.25921
	Mallon and Anderson (2013); Photos courtesy of J. Mallon	Late Cretaceous	Ankylosauria	Panoplosaurus	TMP 1998.098.0001	adult	380	252	260	124	162	77			92	112	244	0.195676
	Mallon and Anderson (2013)	Late Cretaceous	Ankylosauria	Panoplosaurus	TMP 2000.012.0158	adult	365	255	260	143	139		233	91		134	235
	Mallon and Anderson (2013)	Late Cretaceous	Ankylosauria	Panoplosaurus	UALVP 16249	adult	405	299	285	120	190		261	70		127	237
	Ősi et al. (2018)	Late Cretaceous	Ankylosauria	Edmontonia	CMN 8531	adult	365		255	122	155	76	210		95	125	206
	USNM database; Ősi et al. (2018)	Late Cretaceous	Ankylosauria	Edmontonia	USNM 11868	adult	362.71	256.83	237.83	99.37	182.44	82	241		120	95	234
	Mallon and Anderson (2013)	Late Cretaceous	Ceratopsidae	"pachyrhinosaur"	TMP 2002.076.0001	adult	750	548	406	100	125	119			186	519	320	0.793
	Mallon and Anderson (2013)	Late Cretaceous	Ceratopsidae	Centrosaurus	AMNH 5351	adult	637	507	330	42	128	126	371	96	180	385	199
	Mallon and Anderson (2013)	Late Cretaceous	Ceratopsidae	Centrosaurus	AMNH 5377	adult			475	50		102	390	193	187	511	310
	Mallon and Anderson (2013)	Late Cretaceous	Ceratopsidae	Centrosaurus	CMN 348	adult	723	573	409	85	89	124	448	151	225	361	295	0.775
	Mallon and Anderson (2013)	Late Cretaceous	Ceratopsidae	Centrosaurus	CMN 8795	subadult	664	504	356	60	120	115	489	175	168	310	322	0.676
	Mallon and Anderson (2013)	Late Cretaceous	Ceratopsidae	Centrosaurus	NHMUK R4859	adult	656	495	345	30	110		480	127		340	200	0.932
	Mallon and Anderson (2013)	Late Cretaceous	Ceratopsidae	Centrosaurus	ROM 767	adult	652	498	353	56	97	105	352	127	186	352	190	0.901
	Mallon and Anderson (2013)	Late Cretaceous	Ceratopsidae	Centrosaurus	TMP 1997.085.0001	adult	735	544	371	74	173	136			164	273	525	0.8
	original	Late Cretaceous	Ceratopsidae	Centrosaurus	TMP 2006.003.0001	adult	654	530	440	125	108	130	340	135		265	368
	Mallon and Anderson (2013)	Late Cretaceous	Ceratopsidae	Centrosaurus	UALVP 11735	adult	592	440	293	35	147		499	90		261	270	0.769
	Mallon and Anderson (2013)	Late Cretaceous	Ceratopsidae	Centrosaurus	UALVP 16248	adult	540	424	320		95	95	360	140	140	340	214	0.557
	Mallon and Anderson (2013)	Late Cretaceous	Ceratopsidae	Centrosaurus	USNM 8897	adult	665	491	336	61	101	108	392	147	181	384	230	0.862
	Mallon and Anderson (2013)	Late Cretaceous	Ceratopsidae	Centrosaurus	YPM 2015	adult	676	523	365	74	129	113	451	158	199	400	325	0.893
	original	Late Cretaceous	Ceratopsidae	Pachyrhinosaurus	TMP 1993.003.0001	adult	920	710	460	160	124	85				395		0.68
	Mallon and Anderson (2013)	Late Cretaceous	Ceratopsidae	Styracosaurus	CMN 344	adult			307	53		116	564	98	203	319	409
	original	Late Cretaceous	Ceratopsidae	Anchiceratops	CMN 56354	adult	615	440	335	76	103					222		0.791
	original	Late Cretaceous	Ceratopsidae	Anchiceratops	CMN 8535	adult	701	490	359	65	111		430	63		220	400	0.928
	original	Late Cretaceous	Ceratopsidae	Anchiceratops	TMP 1983.001.0001	adult	700	570	400	100	150		470			350	360
	measured from 3D models provided by A. Knapp	Late Cretaceous	Ceratopsidae	Chasmosaurus	AMNH 5401	adult	706.226	586.381	393.774	100.584	153.748		324.814			318.872	528.845	0.74
	measured from 3D models provided by A. Knapp	Late Cretaceous	Ceratopsidae	Chasmosaurus	AMNH 5402	adult	891.617	754.186		230.091	116.638		242.932			258.852	542.522	0.783
	Mallon and Anderson (2013)	Late Cretaceous	Ceratopsidae	Chasmosaurus	CMN 2245	adult				105		128	508	150	195	305	317
	Mallon and Anderson (2013)	Late Cretaceous	Ceratopsidae	Chasmosaurus	CMN 2280	adult	685	512	364	70	102	116	470	140	170	300	306	0.807
	original	Late Cretaceous	Ceratopsidae	Chasmosaurus	CMN 41357	adult	703	568		79	124	107			198	319	340	0.932
	Mallon and Anderson (2013)	Late Cretaceous	Ceratopsidae	Chasmosaurus	CMN 8801	adult	840	666	465	109	103	137				453		0.83
	Mallon and Anderson (2013)	Late Cretaceous	Ceratopsidae	Chasmosaurus	ROM 839	subadult		565	398	49		133	430	120	218	346	186
	Mallon and Anderson (2013)	Late Cretaceous	Ceratopsidae	Chasmosaurus	ROM 843	adult			424	68		140	645	80	200	313	530
	Mallon and Anderson (2013)	Late Cretaceous	Ceratopsidae	Chasmosaurus	TMP 1981.019.0175	adult	695	570	358	69	101		502	131		313	360	0.922
	Mallon and Anderson (2013)	Late Cretaceous	Ceratopsidae	Chasmosaurus	UALVP 40	subadult		458	315	39		99	350	104		261	180
	Mallon and Anderson (2013)	Late Cretaceous	Ceratopsidae	Chasmosaurus	YPM 2016	adult	703	558	386	43	101		558	110		246	375	0.743
	original	Late Cretaceous	Ceratopsidae	Triceratops	MOR 004	adult	1079	867.5	610	203	82	127		61	235	407
	original	Late Cretaceous	Ceratopsidae	Triceratops	MOR 1110	subadult	652	463	384	159	88		370	155.5		452	298.5	0.961
	original	Late Cretaceous	Ceratopsidae	Triceratops	MOR 1120	adult	876	694.5	476.5	152.5	141		420	155		466.25	415
	original	Late Cretaceous	Ceratopsidae	Triceratops	MOR 1122	adult	1140.25	987.5	669.25	202.5	270	163.25	715	114.5	244.75	489.75	632.5	0.846
	original	Late Cretaceous	Ceratopsidae	Triceratops	MOR 1199	subadult	434.5	324	276	82.75	82.5	73.5	250	73	124.5	249	215	0.503
	original	Late Cretaceous	Ceratopsidae	Triceratops	MOR 2951	subadult	529.5	456.5	313	76.5	101	77	311	118	168	311	315	0.766
	original	Late Cretaceous	Ceratopsidae	Triceratops	MOR 2999	adult	805	659.75	420.5	82.5	116.5		449	215		483	471	0.868
	original	Late Cretaceous	Ceratopsidae	Triceratops	MOR 3027	adult	1000	799.5	591	135	126	140			250	530		0.936
	original	Late Cretaceous	Ceratopsidae	Triceratops	ROM 55380	subadult	885	696	490	135	115	135	365	159	200	495	372	0.546
cast	original	Late Cretaceous	Ceratopsidae	Triceratops	TMP 1982.006.0001	adult	1105	767.5	626	330	203	146	640		270	380	530
	Hatcher et al. (1907); Forster (1996)	Late Cretaceous	Ceratopsidae	Triceratops	USNM 1201	adult	990	780	654	141	142		456			499	510	0.879
	Hatcher et al. (1907); Forster (1996)	Late Cretaceous	Ceratopsidae	Triceratops	YPM 1822	adult	847.568	700.541	436.757	103.784	138.601	105.946	403.879	125.576	212.519	412.973	316.768	0.937
	Hatcher et al. (1907); Forster (1996)	Late Cretaceous	Ceratopsidae	Triceratops	YPM 1823	adult	996.582	806.633	499.592	78.0612		132.704			290.182	463.163		0.767
	Hatcher et al. (1907); Forster (1996)	Late Cretaceous	Ceratopsidae	Triceratops	YPM 1834	adult	798.947	666.316	372.632	135.789	158.676	104.211	515.001		212.883	432.632	359.109	0.854
	Sullivan and Xu (2016); Carnegie Quarry (2020)	Late Jurassic	Diplodocidae	Apatosaurus	CM 11162	subadult	501.81	475.94	475.94	359.45	232.8		195.24			201.12	209.44	0.145857
cast	Witmer Lab (2019)	Late Jurassic	Diplodocidae	Apatosaurus	TATE 099-01	adult	359.47	340.75	340.75	283.21	212.1	68.23	192.29	37.84	67.63	192.1	150.93	0.79166
	Carpenter (2013); Whitlock et al. (2010)	Late Jurassic	Diplodocidae	Diplodocus	CM 11255	juvenile	215.53	195.1	195.1	147.41	56.02	31.97	90.36		35.37	152.23	59.04	0.413405
cast	Witmer Lab (2019); Carpenter (2013)	Late Jurassic	Diplodocidae	Diplodocus	CM 11161	adult	375.89	347.49	347.49	314.46	177.56	72.37	165.81	86.51	63.27	202.62	146.24	0.149369
	Tschopp and Mateus (2017)	Late Jurassic	Diplodocidae	Galeamopus	SMA 0011	adult	334.04	290.39	290.39	250.25	134.15	61.08	160.11	84.66	65.95	193.54	177.01	0.166876
	Tschopp and Mateus (2013)	Late Jurassic	Diplodocidae	Kaatedocus	SMA 0004	adult	211.68	171.69	171.69	145.04	78.89	27.47	94.22	57.5	18.57	118.99	89.91	0.13542
	Madsen et al. (1995)	Late Jurassic	Camarasauridae	Camarasaurus	YPM 1905	adult	453.17	401.18	401.18	261.9		63.34			142.61	230.16
	Madsen et al. (1995); Zheng (1996)	Late Jurassic	Camarasauridae	Camarasaurus	DNM 28	adult	493.22	454.39	454.39	262.43		71.52	235.98	103.65	190.35	254.24	209.37	0.29624
cast	Whitlock et al. (2010); Witmer Lab (2019)	Late Jurassic	Camarasauridae	Camarasaurus	CM 11338	subadult	245.59	217.05	217.05	120.55	97.24	45.86	108.97	71.51	99.52	162.28	108.97
	Woodruff and Foster (2017)	Late Jurassic	Camarasauridae	Camarasaurus	GPDM 220	adult	546.45	504.06	504.06	235.01	197.02		226.04	69.81		217.62	231.04
cast	Witmer Lab (2019)	Late Jurassic	Camarasauridae	Camarasaurus	GMNH-PV 101	adult	541.39	483.2	483.2	267.79	223.53	95.11	264.93	94.78	247.36	298.22	196.63	0.27514
	Madsen et al. (1995)	Late Jurassic	Camarasauridae	Camarasaurus	DNM 13786	adult	419.1	375.07	375.07	168.36		84.18			155.25	202.99
	Chure et al. (2010)	Early Cretaceous	Brachiosauridae	Abydosaurus	DINO 16488	adult	297.85	266.67	266.67	163.56		45.82			113.83	148.29
	Winkler et al. (1997)	Early Cretaceous	Iguanodontia	Tenontosaurus	FWMSH 93B1	adult	263.88	211.66	195.44	22.05	64.38	69.81	192.9	85.82		192.67	119.14
	Tennant (2013)	Early Cretaceous	Iguanodontia	Tenontosaurus	LL12275	adult	288.73	234.55	220.28	99.59	74.02	55.31			69.58	114.11		0.1267
	Thomas (2015)	Early Cretaceous	Iguanodontia	Tenontosaurus	OMNH 58340	subadult	452.2	344.03	337.74	113.21	178.62					206.75	112.3	0.242622
reconstruction	Head (1998)	Late Cretaceous	Hadrosauroidea	Protohadros	SMU 74582	adult	617.62	508.42	423.39	158.43	181.1	95.34			230.67	217.51		0.208619
reconstruction	McDonald et al. (2012)	Early Cretaceous	Hadrosauroidea	Eolambia	CEUM 9758+CEUM 5212+juvenile elements from bonebeds	adult	564.19	478.06	407.42	116.13		108.42			206.38	201.29
	Prieto-Marquez et al. (2016)	Late Cretaceous	Hadrosauridae	Eotrachodon	MSC 7949	subadult	379.43	293.56	274.24	94.99	124.12	61.72		50.98	149.73	149.19		0.0576955
	original	Late Cretaceous	Hadrosauridae	Brachylophosaurus	CMN 8893	adult	671	515	420	100	220	98	210	81	243	260	401
	original	Late Cretaceous	Hadrosauridae	Brachylophosaurus	GPDM.115	adult	500	375	275	95	252	60	200		155	165	224
	original	Late Cretaceous	Hadrosauridae	Brachylophosaurus	GPDM.200	adult	480	411	160			105	170		249	218	322
	original	Late Cretaceous	Hadrosauridae	Edmontosaurus	AMNH 5046	subadult	420	360	245		158	61	154	61	150	150	188	0.188
	original	Late Cretaceous	Hadrosauridae	Edmontosaurus	AMNH 5254	adult			550	185		144	248	143	325	340	256
	Campione and Evans (2011)	Late Cretaceous	Hadrosauridae	Edmontosaurus	CM 26259	subadult	748.12	567.293	453.947	164.662		118.421			285.276	279.135
	original	Late Cretaceous	Hadrosauridae	Edmontosaurus	CMN 2288	adult	935	700	570	212	238	162	272	146	300	296	388	0.33
	original	Late Cretaceous	Hadrosauridae	Edmontosaurus	CMN 2289	adult	977	813	545	127		167	351	151	315		515
cast NHM R8927	original	Late Cretaceous	Hadrosauridae	Edmontosaurus	CMN 40586	subadult	735	615	421	168	190	115	155	86	270	216	156	0.094
	original	Late Cretaceous	Hadrosauridae	Edmontosaurus	CMN 8399	subadult	750	600	390	180	174	110	220	95	220	164	230	0.433
	original	Late Cretaceous	Hadrosauridae	Edmontosaurus	CMN 8509	subadult	720	635	395	110	210	112	190	120	255	200	266	0.192
	original	Late Cretaceous	Hadrosauridae	Edmontosaurus	FMNH 15004	adult	1027.13	682.636	569.302	225.116	108.224	166.047	163.943	212.618	393.404	426.047	143.66	0.111
	original	Late Cretaceous	Hadrosauridae	Edmontosaurus	MOR 003	adult	1068	820	540	171	262	165	424	259	300	351	564	0.151
	original	Late Cretaceous	Hadrosauridae	Edmontosaurus	MOR 1626B	adult			460	152		125	150	121	270	291	222
cast DMNH 1493	original	Late Cretaceous	Hadrosauridae	Edmontosaurus	MOR cast DMNH 1493	adult	880.5	650	509	99	255	135.5	245	120	257	260	326	0.15
cast UCMP 128374	original	Late Cretaceous	Hadrosauridae	Edmontosaurus	MOR cast UCMP 128374	adult	874	665	519	180	450	130	340		255	285	215	0.167
	Campione and Evans (2011)	Late Cretaceous	Hadrosauridae	Edmontosaurus	NCSM 23119	adult	942.293	614.098	507.519	160.714		130.263			296.096	350.188
	original	Late Cretaceous	Hadrosauridae	Edmontosaurus	ROM 57100	adult	912	690	482			138	170	170	265	293	260
	original	Late Cretaceous	Hadrosauridae	Edmontosaurus	ROM 801	adult	995	685	550	190	340	168	224	198	355	360	245	0.126
	original	Late Cretaceous	Hadrosauridae	Edmontosaurus	ROM 867	adult			430	175		120	172	135	275	271
	Campione and Evans (2011)	Late Cretaceous	Hadrosauridae	Edmontosaurus	SM R4050	subadult	791.729	526.128	406.015	167.481		137.03			231.18	262.218
cast AMNH 5730	original	Late Cretaceous	Hadrosauridae	Edmontosaurus	TMP 1980.051.0001	adult	975	843	560	235	306	110	290	85	302	210	420	0.07
	original	Late Cretaceous	Hadrosauridae	Edmontosaurus	TMP 2017.014.0001	adult	787	568	444		204	114	180		250	280		0.543
	Campione and Evans (2011)	Late Cretaceous	Hadrosauridae	Edmontosaurus	UMMP 20000	adult	949.624	660.902	503.008	180.451		101.504			278.797	360.902
	original	Late Cretaceous	Hadrosauridae	Edmontosaurus	USNM 12711	adult	970	655	564	120	290		206	151		336	315	0.147
	original	Late Cretaceous	Hadrosauridae	Edmontosaurus	USNM 2414	adult	904	677	483	180	202	126		162	229	236.5	246	0.163
	original	Late Cretaceous	Hadrosauridae	Edmontosaurus	USNM 3814	adult	920	695	506	190	310	167	256	284	55	324	324	0.053
	Mallon and Anderson (2013)	Late Cretaceous	Hadrosauridae	Gryposaurus	CMN 2278	adult	796	615	521	140	238	142	423	211	289	337	318	0.24
	Gates and Sampson (2007)	Late Cretaceous	Hadrosauridae	Gryposaurus	RAM 6797	adult	832.609	560.87	552.174	143.478		132.609			248.559	339.165
	Mallon and Anderson (2013)	Late Cretaceous	Hadrosauridae	Gryposaurus	ROM 764	adult				125		105	376	148	245	223	236
	Mallon and Anderson (2013)	Late Cretaceous	Hadrosauridae	Gryposaurus	ROM 873	adult	791	583	530	134	201	125	176	146	284	305	190	0.501
	Mallon and Anderson (2013)	Late Cretaceous	Hadrosauridae	Gryposaurus	TMP 1980.022.0001	subadult	580	440	382	105	94	92	197	153	220	238	174	0.277
	Mallon and Anderson (2013)	Late Cretaceous	Hadrosauridae	Gryposaurus	TMP 1991.081.0001	subadult	560	410	355	55		91	150		217	243		0.569
cast	original	Late Cretaceous	Hadrosauridae	Maiasaura	MOR cast 019	subadult	403	313	264.5	78.5	181.5	58.5	55	63	146.5	158	209
cast of OTM F138	original	Late Cretaceous	Hadrosauridae	Maiasaura	MOR cast 089	adult	695	525	440	160	320	88	180		212	191
	original	Late Cretaceous	Hadrosauridae	Maiasaura	ROM 44770	adult	630	505	430	170	215	97	208	168	249.5	205	204	0.203
cast YPM 22405	original	Late Cretaceous	Hadrosauridae	Maiasaura	TMP 1989.019.0002	adult	683	591	446	151	318	75	220	125	235	201	115	0.125
	Mallon and Anderson (2013)	Late Cretaceous	Hadrosauridae	Prosaurolophus	CMN 2277	adult	799	670	498	116	130	131			254	296	235	0.36
	Mallon and Anderson (2013)	Late Cretaceous	Hadrosauridae	Prosaurolophus	CMN 2870	adult	803	623	512	98	221	129	270	142	258	295	330	0.215
	Mallon and Anderson (2013)	Late Cretaceous	Hadrosauridae	Prosaurolophus	ROM 1928	subadult	663	501	407	93		96	152		247	218
	Mallon and Anderson (2013)	Late Cretaceous	Hadrosauridae	Prosaurolophus	ROM 787	adult	793	609	488	124	166	133	170	183	271	302	200	0.264
	Mallon and Anderson (2013)	Late Cretaceous	Hadrosauridae	Prosaurolophus	TMM 41262	subadult	639	499	419	114	104	91			223	222
	Mallon and Anderson (2013)	Late Cretaceous	Hadrosauridae	Prosaurolophus	TMP 1984.001.0001	adult	900	650	535	140	248	139			294	280		0.27816
	Mallon and Anderson (2013)	Late Cretaceous	Hadrosauridae	Prosaurolophus	USNM 12712	adult	975	699	575	140	130	123		190	272	348	240
	original	Late Cretaceous	Hadrosauridae	Corythosaurus	AMNH 5338	adult	681.185	548.576	418.469	118.847		89.4492			238.875	248.642		0.267
	original	Late Cretaceous	Hadrosauridae	Corythosaurus	CMN 34825	subadult	438	350	302	61	112	60			175	180	210	0.445
	Mallon and Anderson (2013)	Late Cretaceous	Hadrosauridae	Corythosaurus	CMN 8676	adult	564	434	338	90	141	81	151	140	179	213	300	0.365
	Mallon and Anderson (2013)	Late Cretaceous	Hadrosauridae	Corythosaurus	CMN 8704	adult	596	430	385	82	120	84		145	233	271	220	0.347
	Mallon and Anderson (2013)	Late Cretaceous	Hadrosauridae	Corythosaurus	FMNH 1357	adult	589	462	389	102		97			235	255
	Mallon and Anderson (2013)	Late Cretaceous	Hadrosauridae	Corythosaurus	ROM 1933	adult	617	480	365	80	147	87	160	123	224	230		0.166
	original	Late Cretaceous	Hadrosauridae	Corythosaurus	ROM 1947	subadult	482	376	300	80	182	50			180	125		0.351
	Mallon and Anderson (2013)	Late Cretaceous	Hadrosauridae	Corythosaurus	ROM 776	adult	657	489	407	109	220	83	170	160	271	270	256	0.248
	Mallon and Anderson (2013)	Late Cretaceous	Hadrosauridae	Corythosaurus	ROM 777	adult	683	542	405	100	173	82			237	260	190	0.177
	Mallon and Anderson (2013)	Late Cretaceous	Hadrosauridae	Corythosaurus	ROM 845	adult	630	491	369	100	220	90	205	135	230	273	247	0.243
	Mallon and Anderson (2013)	Late Cretaceous	Hadrosauridae	Corythosaurus	ROM 868	adult	691	535	406	112	124	96			226	292	190	0.431
	Mallon and Anderson (2013)	Late Cretaceous	Hadrosauridae	Corythosaurus	ROM 870	adult			339	97		75	94		195	212	134
	Mallon and Anderson (2013)	Late Cretaceous	Hadrosauridae	Corythosaurus	ROM 871	adult				100		108	188	156	225	275	75
	Mallon and Anderson (2013)	Late Cretaceous	Hadrosauridae	Corythosaurus	TMP 1980.040.0001	adult	575	457	355	114	209	90	262	169	230	266	363	0.154
	Mallon and Anderson (2013)	Late Cretaceous	Hadrosauridae	Corythosaurus	TMP 1982.037.0001	adult	529	419	344	93	136	74	122	141	214	221	150	0.298
	Mallon and Anderson (2013)	Late Cretaceous	Hadrosauridae	Corythosaurus	TMP 1984.121.0001	adult	630	507	384	99	215	92	222	200	235	260	285	0.211
	Mallon and Anderson (2013)	Late Cretaceous	Hadrosauridae	Corythosaurus	TMP 1997.012.0232	subadult	460	320	287	56		68			170	192
	original	Late Cretaceous	Hadrosauridae	Corythosaurus	UALVP 52826	adult	660	478	395	50	165	84.25	250	90		295		0.2
	original	Late Cretaceous	Hadrosauridae	Corythosaurus	USNM 16600	subadult	321.5	235.5	183.5	38	97	49	154			131	185	0.231
	original	Late Cretaceous	Hadrosauridae	Hypacrosaurus	AMNH 5278	adult	651.304	515.87	400.217	127.065		110.908			201.559	251.658		0.241
	original	Late Cretaceous	Hadrosauridae	Hypacrosaurus	CMN 2247	subadult	255	189	155	38	128	47			110	108	140	0.149
	original	Late Cretaceous	Hadrosauridae	Hypacrosaurus	CMN 8501	adult	570	442	390	140	260	102	204	87	245	245	220	0.134
	original	Late Cretaceous	Hadrosauridae	Hypacrosaurus	MOR 549	adult	697.619	549.452	407.459	86.431		80.251			223.803	238.032	233.115
	original	Late Cretaceous	Hadrosauridae	Hypacrosaurus	TMP 1982.010.0001	subadult	510	420	355	140	110	80				222		0.237
	original	Late Cretaceous	Hadrosauridae	Hypacrosaurus	TMP 2006.015.0001	subadult			280	100		71.5	152		135	172	220
	Mallon and Anderson (2013)	Late Cretaceous	Hadrosauridae	Lambeosaurus	CMN 2869	adult	598	456	348	106	130	89	142		191	256	248	0.326
	Mallon and Anderson (2013)	Late Cretaceous	Hadrosauridae	Lambeosaurus	CMN 351	adult	679	552	400	105	116	89			235	279
	Mallon and Anderson (2013)	Late Cretaceous	Hadrosauridae	Lambeosaurus	CMN 8503	adult	469	372	305	55	104	72	102	119	186	211	140	0.248
	Mallon and Anderson (2013)	Late Cretaceous	Hadrosauridae	Lambeosaurus	CMN 8633	subadult	472	370	296	80	82	64	148	38	168	154	168	0.105
	Mallon and Anderson (2013)	Late Cretaceous	Hadrosauridae	Lambeosaurus	CMN 8703	adult	671	552	399	90	160	94	186	160	216	310	190	0.421
	Mallon and Anderson (2013)	Late Cretaceous	Hadrosauridae	Lambeosaurus	CMN 8705	adult	668	507	413	113	152	102	176	152	256	290	192	0.325
	Mallon and Anderson (2013)	Late Cretaceous	Hadrosauridae	Lambeosaurus	FMNH 1479	adult	681	507	400	107	226	95	160	148	212	263	190	0.117
	Mallon and Anderson (2013)	Late Cretaceous	Hadrosauridae	Lambeosaurus	ROM 1218	adult	682	498	422	95	196	101	205	168	216	282	257	0.456
	Mallon and Anderson (2013)	Late Cretaceous	Hadrosauridae	Lambeosaurus	ROM 794	adult	705	569	364	95	182	99	174	162	210	290	185	0.273
	Mallon and Anderson (2013)	Late Cretaceous	Hadrosauridae	Lambeosaurus	ROM 869	subadult	530	444	340	104	114	75	120		212	218	180	0.242
	Mallon and Anderson (2013)	Late Cretaceous	Hadrosauridae	Lambeosaurus	TMP 1966.004.0001	adult	634	496	378	93	140	100	142		225	265	116	0.448
	Mallon and Anderson (2013)	Late Cretaceous	Hadrosauridae	Lambeosaurus	TMP 1981.037.0001	adult	664	540	409	82	202	92	205	175	227	258	155	0.127
	Mallon and Anderson (2013)	Late Cretaceous	Hadrosauridae	Lambeosaurus	TMP 1982.038.0001	adult	492	378	321	77	215	85	280	140	238	247	375	0.295
	Mallon and Anderson (2013)	Late Cretaceous	Hadrosauridae	Lambeosaurus	TMP 1997.012.0128	adult	605	472	350	67	110	100			207	271		0.28
	original	Late Cretaceous	Hadrosauridae	Lambeosaurus	USNM 10309	adult	849.517	696.25	518.693	213.59		86.1236	240.463			304.312
	Mallon and Anderson (2013)	Late Cretaceous	Hadrosauridae	Parasaurolophus	ROM 768	adult	637	486	404	113	180	102	192		235	229	185	0.243
	original	Late Cretaceous	Hadrosauridae	Parasaurolophus	TMP 1990.036.0155	subadult	365	285	232	85	127	52			140	161		0.199

## Sheet: STable3
Supplementary Table 2: Raw cranial measurements for non-North American Late Jurassic, Early Cretaceous and Late Cretaceous taxa used in study. All measurements are in mm.
comments	references	time	group	genus	specimen ID	Ontogeny	as-mq	cs-mq	mt-mq	dt-mq	sw	dh	ppb	oh	cp-jj	sh	qb	SSI
China	Vickaryous et al. (2001); Osi et al. (2017)	Early Cretaceous	Ankylosauria	Gobisaurus domoculus	IVPP V12563	adult	310	272.308	195	75	130		270	70.769		135	272	0.308564
Mongolia	Park et al. (2021)	Late Cretaceous	Ankylosauria	Tarchia timanovae	MPC-D 100/1353	adult	286.81	197.92	180.56	64.58	140.97		248.61	67.14		153.52	262.89	0.132099
Mongolia	Osi et al. (2017)	Late Cretaceous	Ankylosauria	Pinacosaurus grangeri	ZPAL MgD-II/1	adult	182		123	61	90	36	110		37	75	134
Mongolia	Arbour and Currie (2015); Osi et al. (2017) ; Arbour et al. (2014)	Late Cretaceous	Ankylosauria	Saichania chulsanensis	MPC 100/151	adult	291	181.82	198	70	176	73	252		65	131	252
Mongolia	Arbour and Currie (2015); Osi et al. (2017) ; Arbour et al. (2014)	Late Cretaceous	Ankylosauria	Saichania chulsanensis	PIN 3142/250	adult	230	234.85	183	77	116	68	197		70	144	222	0.0755039
Mongolia	Osi et al. (2017)	Early Cretaceous	Ankylosauria	Shamosaurus scutatus	PIN 3779/2	adult	257		194	78	83	63	228		64	99	235	0.193594
China	Arbour and Currie (2015); Osi et al. (2017)	Late Cretaceous	Ankylosauria	Tianzhenosaurus youngi' = Saichania chulsanensis	HBV-10001	adult	176		136	66	113		177			99	146
Mongolia	Arbour and Currie (2015); Osi et al. (2017)	Late Cretaceous	Ankylosauria	Tsagantegia longicranialis	MPC 700/17	adult	222		158	58	136		178			97	164
China	Arbour and Currie (2015); Osi et al. (2017)	Late Cretaceous	Ankylosauria	Zhongyuansaurus luoyangensis'	HGM 41HIII-0002	adult	261		168	60	86		209			85	156
Mongolia	Park et al. (2020)	Late Cretaceous	Ankylosauria	Talarurus plicatospineus	MPC-D 100/1354	adult	227.17	176.09	160.87	64.13	110.87		165.45	43.64		89.34	174.55	0.107734
Mongolia	Arbour et al. (2014)	Late Cretaceous	Ankylosauria	Tarchia kielanae	INBR 21004	adult	194	201.52	143	68	109	53.8	147		77.33	95	154
Mongolia	Carpenter et al. (2011)	Late Cretaceous	Ankylosauria	Saichania chulsanensis	IGM 100/1305	adult	358.11	266.22	217.57	110.81	159.46	77.26	233.78	51.35	76.43	128.38	235.14	0.0857817
China	You et al. (2003)	Early Cretaceous	Iguanodontia	Equijubus normani	IVPP V 12534	adult	620.59	511.76	447.06	180.88		105.88			261.54	205.88
China	You et al. (2011)	Early Cretaceous	Iguanodontia	Xuwulong yueluni	GSGM-F00001	adult	348.96	285.42	244.79	64.58		72.93			148.68	171.88
Mongolia	Gates et al (2018)	Early Cretaceous	Iguanodontia	Chyorodon	MPC-D 100/801	adult	453.4	363.77	328.26	82.07		71.01			126.03	161.22
Mongolia	Norman (1998); Gates et al (2018)	Early Cretaceous	Iguanodontia	Altirhinus novum	PIN 3386/8	adult	698.37	563.41	475.61	153.66		86.18			216.53	158.54
Spain	McDonald et al. (2012)	Early Cretaceous	Iguanodontia	Proa valdearinnoensis	AR-1-2012 + AR-1-2013	adult	651.95	553.25	453.25	203.9	127.14	98.7	301.82	161.84	218.71	227.27		0.211812
Mongolia	Tsogtbaatar et al. (2014)	Late Cretaceous	Iguanodontia	Plesiohadros djadokhtaensis	MPC-D100/745	adult	667.27	543.74	466.67		200.84	109.09	433.34	128.8	180.79	212.12		0.191967
Brazil	Poropat and Kear (2013)	Early Cretaceous	Titanosaur	Euhelopus	PMU 24705_1	adult	336.17	309.574	309.574	164.894	102.128	46.809			145.06	159.971	184.043	0.516417
Brazil	Zaher et al. (2011)	Early Cretaceous	Titanosaur	Tapuisaurus macedoi	MZSP-PV 807	adult	338.16	321.71	321.71	209.21	114.04	48.52	111.84	82.24	67.91	209.21	88.16	0.303646
Argentina	Martínez et al. (2016)	Late Cretaceous	Titanosaur	Sarmientosaurus musacchioi	MDT-PV 2	adult	364.78	329.56	329.56	155.97	207.87		222.62	78.73		197.48	149.32	0.482377
Mongolia	Wilson (2005)	Late Cretaceous	Titanosaur	Nemegtosaurus mongoliensis	Z.PAL MgD-I/9	adult	476.29	449.48	449.48	336.08	213.34		183.06	86.61			150	0.158485

## Sheet: STable4
Supplementary Data Table S4: Raw body mass estimates used to construct body size distributions.
comments	source(s) of mass estimate	phylogenetic reference(s)	phylogenetic identification in plot	lowest classification provided in provided in refrence for phylogenetic position	taxon	formation	mass (kg)	mass (g)	log (mass)	taxa potentially problematic
juvenile	Molina-Pére et al. (2020)	Mannion et al. (2019a)	Eusauropoda	Eusauropoda	Daanosaurus zhangi	Shaximiao	12000	12000000	7.07918	N
	Calculated using sauropodomorph femur length equation of O’Gorman and Hone (2012)	Li et al. (2011)	Eusauropoda	Mamenchisauridae	Datousaurus bashanensis	Shaximiao	6319.42	6.31942e+06	6.80068	N
	Benson et al. (2017)	Mannion et al. (2019a)	Eusauropoda	Mamenchisauridae	Mamenchisaurus constructus	Shaximiao	17591.2	1.75912e+07	7.24529	N
	Imputed averaged value of Mamenchisaurus spp. from Benson et al. (2017)	Mannion et al. (2019a)	Eusauropoda	Mamenchisauridae	Mamenchisaurus hochuanensis	Shaximiao	11915.8	1.19158e+07	7.07612	N
	Imputed averaged value of Mamenchisaurus spp. from Benson et al. (2017)	Mannion et al. (2019a)	Eusauropoda	Mamenchisauridae	Mamenchisaurus jingyanensis	Shaximiao	11915.8	1.19158e+07	7.07612	N
	Benson et al. (2017)	Mannion et al. (2019a)	Eusauropoda	Mamenchisauridae	Mamenchisaurus youngi	Shaximiao	6240.44	6.24044e+06	6.79522	N
	Imputed averaged value of Omeisaurus spp. from Benson et al. (2017)	Mannion et al. (2019a)	Eusauropoda	Mamenchisauridae	Omeisaurus changshouensis	Shaximiao	11075.2	1.10752e+07	7.04435	N
	Imputed averaged value of Omeisaurus spp. from Benson et al. (2017)	Mannion et al. (2019a)	Eusauropoda	Mamenchisauridae	Omeisaurus fuxiensis	Shaximiao	11075.2	1.10752e+07	7.04435	N
	Benson et al. (2017)	Mannion et al. (2019a)	Eusauropoda	Mamenchisauridae	Omeisaurus junghsiensis	Shaximiao	8901.15	8.90115e+06	6.94945	N
	Imputed averaged value of Omeisaurus spp. from Benson et al. (2017)	Mannion et al. (2019a)	Eusauropoda	Mamenchisauridae	Omeisaurus luoquanensis	Shaximiao	11075.2	1.10752e+07	7.04435	N
	Benson et al. (2017)	Mannion et al. (2019a)	Eusauropoda	Mamenchisauridae	Omeisaurus maoianus	Shaximiao	7796.37	7.79637e+06	6.89189	N
	Benson et al. (2017)	Mannion et al. (2019a)	Eusauropoda	Mamenchisauridae	Omeisaurus tianfuensis	Shaximiao	15330.7	1.53307e+07	7.18556	N
		Li et al. (2011)	Eusauropoda	Cetiosauridae	Protognathosaurus oxyodon	Shaximiao				Y
	Benson et al. (2017)	Mannion et al. (2019a)	Eusauropoda	Eusauropoda	Shunosaurus lii	Shaximiao	6532.47	6.53247e+06	6.81508	N
Li et al. (2011) says Zigongosaurus is synonymous with Mamenchisaurus	Molina-Pére et al. (2020)	Mannion et al. (2019a)	Eusauropoda	Mamenchisauridae	Zigongosaurus fuxiensis	Shaximiao	38000	38000000	7.57978	N
	Benson et al. (2017)	Madzia et al. (2021)	Neornithischia	Neornithischia	Agilisaurus louderbacki	Shaximiao	31.519	21084.3	4.32396	N
	Benson et al. (2017)	Madzia et al. (2021)	Neornithischia	Neornithischia	Hexinlusaurus multidens	Shaximiao	52.0406	52040.6	4.71634	N
	Benson et al. (2017)	Li et al. (2011)	Neornithischia	Fabrosauridae	Xiaosaurus dashanpuensis	Shaximiao	5.28656	5286.56	3.72317	N
	Paul (2016)	Madzia et al. (2021)	Neornithischia	Neornithischia	Yandusaurus hongheensis	Shaximiao	140	140000	5.14613	N
	Calculated using ornithischian femur length equation of O’Gorman and Hone (2012)	Li et al. (2011)	Stegosauria	Stegosauridae	Chialingosaurus kuani	Shaximiao	974.045	974045	5.98858	Y
	Benson et al. (2017)	Madzia et al. (2021)	Stegosauria	Huayangosauridae	Chungkingosaurus jiangbeiensis	Shaximiao	3108.81	3.10881e+06	6.49259	N
	Benson et al. (2017)	Madzia et al. (2021)	Stegosauria	Stegosauria	Gigantspinosaurus sichuanensis	Shaximiao	2220.86	2.22086e+06	6.34652	N
	Used Gigantspinosaurus sichuanensis from Benson et al. (2014)	Madzia et al. (2021)	Stegosauria	Stegosauria	Gigantspinosaurus sp.	Shaximiao	2220.86	2.22086e+06	6.34652	N
	Seebacher (2001)	Madzia et al. (2021)	Stegosauria	Huayangosauridae	Huayangosaurus taibaii	Shaximiao	301.4	301400	5.47914	N
	Benson et al. (2017)	Madzia et al. (2021)	Stegosauria	Stegosauridae	Tuojiangosaurus multispinus	Shaximiao	5154.5	5.1545e+06	6.71219	N
	Calculated using ornithischian femur length equation of O’Gorman and Hone (2012)	Hao et al. (2018)	Stegosauria	Stegosauridae	Yingshanosaurus jichuanensis	Shaximiao	890.823	890823	5.94979	N
	Used Gongbusaurus wucaiwanensis from Benson et al. (2017)	Li et al. (2011)	Neornithischia	Fabrosauridae	Gongbusaurus shiyii	Shaximiao	4.93032	4930.32	3.69288	N
	Imputed Giraffatitan brancai from Benson et al. (2017)	Molina-Pérez et al. (2020)	Titanosauriformes	Titanosauriformes	"Archbishop"	Tendaguru	34003.1	3.40031e+07	7.53152	N
	Paul (2016)	Mannion et al. (2019a)	Titanosauriformes	Titanosauriformes	Australodocus bohetii	Tendaguru	4000	4000000	6.60206	N
	Gunga et al. (1999)	Mannion et al. (2019a)	Diplodocoidea	Dicraeosauridae	Dicraeosaurus hansemanni	Tendaguru	12800	12800000	7.10721	N
	Benson et al. (2017)	Mannion et al. (2019a)	Diplodocoidea	Dicraeosauridae	Dicraeosaurus sattleri	Tendaguru	10163.3	1.01633e+07	7.00703	N
	Benson et al. (2017)	Mannion et al. (2019a)	Titanosauriformes	Brachiosauridae	Giraffatitan brancai	Tendaguru	34003.1	3.40031e+07	7.53152	N
	Benson et al. (2017)	Mannion et al. (2019a)	Eusauropoda	Eusauropoda	Janenschia robusta	Tendaguru	13649.2	1.36492e+07	7.13511	N
	Molina-Pérez et al. (2020)	Mannion et al. (2019a)	Eusauropoda	Turiasauria	Tendaguria tanzaniensis	Tendaguru	12000	12000000	7.07918	N
	Benson et al. (2017)	Mannion et al. (2019a)	Diplodocoidea	Diplodocidae	Tornieria africanus	Tendaguru	12298.6	1.22986e+07	7.08985	N
	Imputed averaged value of Mamenchisaurus spp. from Benson et al. (2017)	Mannion et al. (2019a)	Eusauropoda	Mamenchisauridae	Wamweracaudia keranjei	Tendaguru	11915.8	1.19158e+07	7.07612	N
	Benson et al. (2014)	Madzia et al. (2021)	Ornithopoda	Dryosauridae	Dysalotosaurus lettowvorbecki	Tendaguru	143.701	143701	5.15746	N
	Benson et al. (2017)	Madzia et al. (2021)	Stegosauria	Stegosauridae	Kentrosaurus aethiopicus	Tendaguru	1596.86	1.59686e+06	6.20327	N
	Benson et al. (2017)	Mannion et al. (2019a)	Diplodocoidea	Diplodocoidea	Amphicoelias altus	Morrison	30717.6	30717600	7.48739	N
	Benson et al. (2017)	Mannion et al. (2019a)	Diplodocoidea	Diplodocoidea	Apatosaurus ajax	Morrison	29235.3	2.92353e+07	7.46591	N
	Benson et al. (2017)	Mannion et al. (2019a)	Diplodocoidea	Diplodocoidea	Apatosaurus louisae	Morrison	41268.7	4.12687e+07	7.61562	N
	Benson et al. (2017)	Mannion et al. (2019a)	Diplodocoidea	Diplodocoidea	Barosaurus lentus	Morrison	13163.5	1.31635e+07	7.11937	N
	Benson et al. (2017)	Mannion et al. (2019a)	Titanosauriformes	Brachiosauridae	Brachiosaurus altithorax	Morrison	57680.6	5.62549e+07	7.75016	N
	Benson et al. (2017)	Mannion et al. (2019a)	Diplodocoidea	Diplodocoidea	Brontosaurus excelsus	Morrison	30541.9	3.05419e+07	7.4849	N
	Benson et al. (2017)	Mannion et al. (2019a)	Diplodocoidea	Diplodocoidea	Brontosaurus parvus	Morrison	25463.6	2.54636e+07	7.40592	N
	Molina-Perez et al. (2019)	Mannion et al. (2019a)	Diplodocoidea	Diplodocoidea	Brontosaurus yahnahpin	Morrison	14000	14000000	7.14613	N
	Benson et al. (2017)	Mannion et al. (2019a)	Macronaria	Macronaria (non-titanosauriform)	Camarasaurus grandis	Morrison	18174.6	1.81746e+07	7.25946	N
	Benson et al. (2017)	Mannion et al. (2019a)	Macronaria	Macronaria (non-titanosauriform)	Camarasaurus lentus	Morrison	3838.99	3.83899e+06	6.58422	N
	Benson et al. (2017)	Mannion et al. (2019a)	Macronaria	Macronaria (non-titanosauriform)	Camarasaurus lewisi	Morrison	13810.4	1.38104e+07	7.14021	N
	Mazzetta et al. (2004)	Mannion et al. (2019a)	Macronaria	Macronaria (non-titanosauriform)	Camarasaurus supremus	Morrison	9300	9300000	6.96848	N
	Benson et al. (2017)	Mannion et al. (2019a)	Diplodocoidea	Diplodocoidea	Diplodocus carnegii	Morrison	17008.5	1.70085e+07	7.23067	N
	Benson et al. (2017)	Mannion et al. (2019a)	Diplodocoidea	Diplodocoidea	Diplodocus hallorum	Morrison	30378.8	3.03788e+07	7.48257	N
	Benson et al. (2017)	Mannion et al. (2019a)	Diplodocoidea	Diplodocoidea	Galeamopus hayi	Morrison	16333.1	1.63331e+07	7.21307	N
	Molina-Perez et al. (2019)	Mannion et al. (2019a)	Diplodocoidea	Diplodocoidea	Galeamopus pabsti	Morrison	5100	5100000	6.70757	N
	Benson et al. (2017)	Mannion et al. (2019a)	Diplodocoidea	Diplodocoidea	Haplocanthosaurus delfsi	Morrison	33036.6	3.30366e+07	7.519	N
	Benson et al. (2017)	Mannion et al. (2019a)	Diplodocoidea	Diplodocoidea	Haplocanthosaurus priscus	Morrison	11897.5	1.18975e+07	7.07546	N
	Molina-Perez et al. (2019)	Mannion et al. (2019a)	Diplodocoidea	Diplodocoidea	Kaatedocus siberi	Morrison	1900	1900000	6.27875	N
	Paul (2019)	Carpenter (2018)	Diplodocoidea	Rebbachisauridae	Maraapunisaurus fragillimus	Morrison	100000	100000000	8	N
	Molina-Perez et al. (2019)	Mannion et al. (2019a)	Diplodocoidea	Diplodocoidea	Supersaurus vivianae	Morrison	35000	35000000	7.54407	N
	Benson et al. (2017)	Mannion et al. (2019a)	Diplodocoidea	Dicraeosauridae	Suuwassea emilieae	Morrison	10104.8	1.01048e+07	7.00453	N
	Benson et al. (2017)	Madzia et al. (2021)	Ankylosauria	Ankylosaurinae	Gargoyleosaurus parkpinorum	Morrison	891.009	891009	5.94988	N
	Farlow et al. (2010)	Madzia et al. (2021)	Ankylosauria	Nodosaurinae	Mymoorapelta maysi	Morrison	450	450000	5.65321	N
	Used Gargoyleosaurus parkpinorum from Benson et al. (2017)	Madzia et al. (2021)	Ankylosauria	Polacanthidae	Polacanthidae indet.	Morrison	891.009	891009	5.94988	N
	Benson et al. (2017)	Madzia et al. (2021)	Neornithischia	Heterodontosauridae	Fruitadens haagarorum	Morrison	0.728137	728.137	2.86221	N
	Used Othnielosaurus consors from Benson et al. (2017)	Madzia et al. (2021)	Neornithischia	Neornithischia	Nanosaurus agilis	Morrison	16.5127	16512.7	4.21782	N
	Used Camptosaurus dispar from Benson et al. (2017)	Madzia et al. (2021)	Ankylopollexia	Ankylopollexia	Camptosaurus aphanoecetes	Morrison	1323.81	1.03721e+06	6.01586	N
	Benson et al. (2017)	Madzia et al. (2021)	Ankylopollexia	Ankylopollexia	Camptosaurus dispar	Morrison	1323.81	1.03721e+06	6.01586	N
	Benson et al. (2017)	Madzia et al. (2021)	Ornithopoda	Dryosauridae	Dryosaurus altus	Morrison	168.957	155804	5.19258	N
	Used Dryosaurus altus from Benson et al. (2017)	Madzia et al. (2021)	Ornithopoda	Dryosauridae	Dryosaurus elderae	Morrison	168.957	155804	5.19258	N
	Benson et al. (2017)	Madzia et al. (2021)	Stegosauria	Stegosauridae	Hesperosaurus mjosi	Morrison	4722.81	4.72281e+06	6.6742	N
	Paul (2016)	Madzia et al. (2021)	Stegosauria	Stegosauridae	Miragaia longispinus	Morrison	2000	2000000	6.30103	N
	Table 6 from Farlow et al. (2010)	Madzia et al. (2021)	Stegosauria	Stegosauridae	Stegosaurus armatus	Morrison	5280	5280000	6.72263	Y
	Benson et al. (2017)	Madzia et al. (2021)	Stegosauria	Stegosauridae	Stegosaurus stenops	Morrison	4869.07	3685479	6.56649	N
	Benson et al. (2017)	Madzia et al. (2021)	Stegosauria	Stegosauridae	Stegosaurus ungulatus	Morrison	6953.92	6.95392e+06	6.84223	Y
	Based on femur length scaling equation in Table 1 of Campione and Evans (2012); femur length measured from figure in Xuri et al. (2007)	Mannion et al. (2019a)	Titanosauriformes	Somphospondyli	Dongbeititan dongi	Yixian	6538.82	6.53882e+06	6.8155	N
	Imputed Euhelopus zdanskyi from Benson et al. (2017)	Mannion et al. (2019a)	Titanosauriformes	Somphospondyli	cf. Euhelopus	Yixian	5924.14	5.92414e+06	6.77263	N
	Based on femur length scaling equation in Table 1 of Campione and Evans (2012); femur length measured from figure in Zhou et al. (2018)	Mannion et al. (2019b)	Titanosauriformes	Somphospondyli	Liaoningotitan sinensis	Yixian	6407.76	6.40776e+06	6.80671	N
	Benson et al. (2017)	Madzia et al. (2021)	Neornithischia	Jeholosauridae	Jeholosaurus shangyuanensis	Yixian	9.66398	9663.98	3.98516	N
	Imputed Zalmoxes robustus from Benson et al. (2017)	Madzia et al. (2021)	Hadrosauroidea	Hadrosauroidea	Bolong yixianensis	Yixian	185.631	185631	5.26865	N
	Used ornithischian femur length scaling algorithm from O'Gorman and Hone (2012)	Madzia et al. (2021)	Ankylosauria	Ankylosauridae	Liaoningosaurus paradoxus	Yixian	0.297653	297.653	2.47371	N
	Benson et al. (2017)	Madzia et al. (2021)	Hadrosauroidea	Hadrosauroidea	Jinzhousaurus yangi	Yixian	1163.92	1163917	6.06592	N
	Imputed Psittacosaurus gobiensis from Benson et al. (2017)	Madzia et al. (2021)	Ceratopsia	Ceratopsia	Psittacosaurus lujiatunensis	Yixian	9.88672	9886.72	3.99505	N
argued to be synonymous with Psittacosaurus lujiatunensis by Brandon Hedrick	Imputed Psittacosaurus gobiensis from Benson et al. (2017)	used phylogenetic position of Psittacosaurus	Ceratopsia	Ceratopsia	Hongshanosaurus houi	Yixian	9.88672	9886.72	3.99505	Y
	Paul (2016)	Madzia et al. (2021)	Ceratopsia	Neoceratopsia	Liaoceratops yanzigouensis	Yixian	2	2000	3.30103	N
	Imputed Psittacosaurus gobiensis from Benson et al. (2017)	Madzia et al. (2021)	Ceratopsia	Ceratopsia	Psittacosaurus lujiatunensis	Yixian	9.88672	9886.72	3.99505	N
	Imputed Psittacosaurus gobiensis from Benson et al. (2017)	Madzia et al. (2021)	Ceratopsia	Ceratopsia	Psittacosaurus major	Yixian	9.88672	9886.72	3.99505	Y
	Molina-Pérez et al. (2020)	Mannion et al. (2019a)	Eusauropoda	Turiasauria	Mierasaurus bobyoungi	Cedar Mountain	4800	4800000	6.68124	N
	Molina-Pérez et al. (2020)	Mannion et al. (2019a)	Eusauropoda	Turiasauria	Moabosaurus utahensis	Cedar Mountain	5700	5700000	6.75587	N
	Based on humerus length vs. body mass scaling equation (mammals + reptiles) from Campione and Evans (2012)	Mannion et al. (2019a)	Titanosauriformes	Brachiosauridae	Abydosaurus mcintoshi	Cedar Mountain	22509.5	2.25095e+07	7.35236	N
	Molina-Pérez et al. (2020)	Molina-Pérez et al. (2020)	Titanosauriformes	Somphospondyli	cf. Astrodon	Cedar Mountain	30000	30000000	7.47712	N
	Molina-Pérez et al. (2020)	Mannion et al. (2019b)	Titanosauriformes	Somphospondyli	Brontomerus mcintoshi	Cedar Mountain	6900	6900000	6.83885	N
	Benson et al. (2017)	Mannion et al. (2019a)	Titanosauriformes	Brachiosauridae	Cedarosaurus weiskopfae	Cedar Mountain	15295.7	1.52957e+07	7.18457	N
	Molina-Pérez et al. (2020)	Mannion et al. (2019a)	Titanosauriformes	Brachiosauridae	Venenosaurus dicrocei	Cedar Mountain	8000	8000000	6.90309	N
	Benson et al. (2017)	Madzia et al. (2021)	Ankylosauria	Panoplosaurini	Animantarx ramaljonesi	Cedar Mountain	764.118	764118	5.88316	N
	Based on femur length vs. body mass scaling equation (mammals + reptiles) from Campione and Evans (2012)	Madzia et al. (2021)	Ankylosauria	Ankylosauridae	Cedarpelta bilbeyhallorum	Cedar Mountain	2189.71	2.18971e+06	6.34039	N
	Benson et al. (2017)	Madzia et al. (2021)	Ankylosauria	Ankylosauridae or Nodosauridae	Gastonia burgei	Cedar Mountain	1411.22	1.41122e+06	6.14959	N
	Used Gastonia burgei from Benson et al. (2017)	Madzia et al. (2021)	Ankylosauria	Ankylosauridae or Nodosauridae	Gastonia lorriemcwhinneyae	Cedar Mountain	1411.22	1.41122e+06	6.14959	N
	Based on femur length vs. body mass scaling equation (mammals + reptiles) from Campione and Evans (2012)	Madzia et al. (2021)	Ankylosauria	Nodosaurinae	Peloroplites cedrimontanus	Cedar Mountain	1920.64	1.92064e+06	6.28345	N
	Used Leptoceratops gracilis from Benson et al. (2017)	Madzia et al. (2021)	Ceratopsia	Neoceratopsia	Neoceratopsia indet.	Cedar Mountain	416.195	416195	5.6193	N
	Based on femur length vs. body mass scaling equation (mammals + reptiles) from Campione and Evans (2012)	Madzia et al. (2021)	Hadrosauromorpha	Hadrosauromorpha	Eolambia caroljonesa	Cedar Mountain	2270.89	2.27089e+06	6.3562	N
	Used Camptosaurus dispar from Benson et al. (2017)	Madzia et al. (2021)	Ankylopollexia	Styracosterna	Cedrorestes crichtoni	Cedar Mountain	1323.81	1.32381e+06	6.12183	N
	Paul (2016)	Madzia et al. (2021)	Ankylopollexia	Styracosterna	Iguanacolossus fortis	Cedar Mountain	5000	5000000	6.69897	N
	Benson et al. (2012)	Madzia et al. (2021)	Ankylopollexia	Styracosterna	Planicoxa venenica	Cedar Mountain	261.767	261767	5.41791	N
	Holtz and Rey (2007)	Madzia et al. (2021)	Ankylopollexia	Styracosterna	Hippodraco scutodens	Cedar Mountain	340.5	340500	5.53212	N
	Benson et al. (2017)	Madzia et al. (2021)	Ornithopoda	Clypeodonta	Tenontosaurus tilletti	Cedar Mountain	1019.64	1.01964e+06	6.00845	N
	Used Stegoceras validum from Benson et al. (2017)	Madzia et al. (2021)	Pachycephalosauria	Pachycephalosauridae	Pachycephalosauridae indet.	Cedar Mountain	16.1432	16143.2	4.20799	N
	Paul (2016)	Madzia et al. (2021)	Neornithischia	Orodrominae	Zephyrosaurus schaffi	Cedar Mountain	29	29000	4.4624	N
	Longrich (2010)	Mannion et al. (2019a)	Titanosauriformes	Titanosauria	Nemegtosaurus mongoliensis	Nemegt	8400000	8400000	6.92428	N
Mannion et al. (2019b) mentions that this may be Nemegtosaurus	Benson et al. (2017)	Mannion et al. (2019a)	Titanosauriformes	Titanosauria	Opisthocoelicaudia skarzynskii	Nemegt	25418.1	2.54181e+07	7.40514	Y
	Benson et al. (2017)	Madzia et al. (2021)	Ankylosauria	Ankylosaurinae	Saichania chulsanensis	Nemegt	611.972	611972	5.78673	N
According to Arbour et al. (2014) often confused with Saichania chulsanensis	Paul (2016)	Madzia et al. (2021)	Ankylosauria	Ankylosaurinae	Tarchia teresae	Nemegt	2500	2500000	6.39794	Y
Arguably Saurolophus	Paul (2016)	Prieto-Márquez (2011)	Hadrosauridae	Hadrosaurinae	Barsboldia sicinskii	Nemegt	5000	5000000	6.69897	N
phylogenetic - used Saurolophus osborni	Benson et al. (2017)	Madzia et al. (2021)	Hadrosauridae	Saurolophini	Saurolophus angustirostris	Nemegt	5517.84	5.51784e+06	6.74177	N
Possibly juvenile of Prenocephale	Benson et al. (2017)	Madzia et al. (2021)	Pachycephalosauria	Pachycephalosaurinae	Homalocephale calathocercos	Nemegt	38.5063	38506.3	4.58553	N
	Benson et al. (2017)	Madzia et al. (2021)	Pachycephalosauria	Pachycephalosaurinae	Prenocephale prenes	Nemegt	62.5187	62518.7	4.79601	N
	Seebacher (2001)	Madzia et al. (2021)	Ankylosauria	Ankylosaurinae	Pinacosaurus grangeri	Djadokhta	707.2	707200	5.84954	N
	Benson et al. (2017)	Madzia et al. (2021)	Neoceratopsia	Leptoceratopsidae	Udanoceratops tchizhovi	Djadokhta	772.174	772174	5.88772	N
	Benson et al. (2017)	Madzia et al. (2021)	Neoceratopsia	Protoceratopsidae	Protoceratops andrewsi	Djadokhta	82.6947	82694.7	4.91748	N
	Used Protoceratops andrewsi from Benson et al. (2017)	Czepiński (2020)	Neoceratopsia	Protoceratopsidae	Bainoceratops efremovi	Djadokhta	82.6947	82694.7	4.91748	N
	Used Brachylophosaurus canadensis from Benson et al. (2017), following Tsogtbaatar et al. (2014)	Madzia et al. (2021)	Hadrosauromorpha	Hadrosauromorpha	Plesiohadros djadokhtaensis	Djadokhta	4458.36	4.45836e+06	6.64918	N
	Imputed Euoplocephalus tutus from Benson et al. (2017)	Madzia et al. (2021)	Ankylosauria	Ankylosaurini	Anodontosaurus lambei	Dinosaur Park	2329.63	2.32963e+06	6.36729	N
	Imputed Euoplocephalus tutus from Benson et al. (2017)	Madzia et al. (2021)	Ankylosauria	Ankylosaurini	Dyoplosaurus acutosquameus	Dinosaur Park	2329.63	2.32963e+06	6.36729	N
	Benson et al. (2017)	Madzia et al. (2021)	Ankylosauria	Panoplosaurini	Edmontonia rugosidens	Dinosaur Park	1530.51	1.53051e+06	6.18483	N
	Benson et al. (2017)	Madzia et al. (2021)	Ankylosauria	Ankylosaurini	Euoplocephalus tutus	Dinosaur Park	2329.63	2.32963e+06	6.36729	N
	Imputed Edmontonia longiceps from Benson et al. (2017)	Madzia et al. (2021)	Ankylosauria	Panoplosaurini	Panoplosaurus mirus	Dinosaur Park	2256.75	2.25675e+06	6.35348	N
	Used Achelousaurus horneri from Benson et al. (2017)	Madzia et al. (2021)	Ceratopsidae	Pachyrostra	cf. Achelousaurus sp.	Dinosaur Park	1571.71	1.57171e+06	6.19637	N
	Benson et al. (2017)	Madzia et al. (2021)	Ceratopsidae	Centrosaurini	Centrosaurus apertus	Dinosaur Park	2492.64	2.49264e+06	6.39666	N
	Imputed Chasmosaurus belli from Benson et al. (2017)	Madzia et al. (2021)	Ceratopsidae	Chasmosaurinae	Chasmosaurinae n. sp.	Dinosaur Park	3097.62	3.09762e+06	6.49103	N
	Benson et al. (2017)	Madzia et al. (2021)	Ceratopsidae	Chasmosaurinae	Chasmosaurus belli	Dinosaur Park	3097.62	3.09762e+06	6.49103	N
Includes material assigned to "Mojoceratops perifania"	Imputed Chasmosaurus belli from Benson et al. (2017)	Madzia et al. (2021)	Ceratopsidae	Chasmosaurinae	Chasmosaurus canadensis	Dinosaur Park	3097.62	3.09762e+06	6.49103	N
	Benson et al. (2017)	Madzia et al. (2021)	Ceratopsidae	Chasmosaurinae	Chasmosaurus russelli	Dinosaur Park	3141.94	3.14194e+06	6.4972	N
	Benson et al. (2017)	Madzia et al. (2021)	Ceratopsidae	Chasmosaurinae	cf. Chasmosaurus russelli	Dinosaur Park	3141.94	3.14194e+06	6.4972	N
	Imputed Chasmosaurus russelli from Benson et al. (2017)	Campbell (2015)	Ceratopsidae	Chasmosaurinae	Mercuriceratops gemini	Dinosaur Park	3141.94	3.14194e+06	6.4972	N
	Benson et al. (2017)	Madzia et al. (2021)	Ceratopsidae	Centrosaurini	Styracosaurus albertensis	Dinosaur Park	4167.91	4.16791e+06	6.61992	N
	Mallon (2019)	Madzia et al. (2021)	Ceratopsidae	Chasmosaurinae	Vagaceratops irvinensis	Dinosaur Park	2704.38	2704382	6.43207	N
	Brown et al. (2013b)	Madzia et al. (2021)	Neoceratopsia	Leptoceratopsidae	Unescoceratops koppelhusae	Dinosaur Park	160	160000	5.20412	N
	Benson et al. (2017)	Madzia et al. (2021)	Hadrosauridae	Lambeosaurini	Corythosaurus casuarius	Dinosaur Park	4361.68	4.36168e+06	6.63965	N
	Benson et al. (2017)	Madzia et al. (2021)	Hadrosauridae	Lambeosaurini	Corythosaurus intermedius	Dinosaur Park	3455.66	3.45566e+06	6.53853	N
	Benson et al. (2017)	Madzia et al. (2021)	Hadrosauridae	Kritosaurini	Gryposaurus notabilis	Dinosaur Park	4311.58	4.31158e+06	6.63464	N
	Benson et al. (2017)	Madzia et al. (2021)	Hadrosauridae	Lambeosaurini	Lambeosaurus clavinitialis	Dinosaur Park	5584.78	5.58478e+06	6.74701	N
	Benson et al. (2017)	Madzia et al. (2021)	Hadrosauridae	Lambeosaurini	Lambeosaurus lambei	Dinosaur Park	3300.26	3.30026e+06	6.51855	N
	Benson et al. (2017)	Madzia et al. (2021)	Hadrosauridae	Lambeosaurini	Lambeosaurus magnicristatus	Dinosaur Park	3012.76	3.01276e+06	6.47897	N
	Benson et al. (2017)	Madzia et al. (2021)	Hadrosauridae	Parasaurolophini	Parasaurolophus walkeri	Dinosaur Park	5117.57	5.11757e+06	6.70906	N
	Benson et al. (2017)	Madzia et al. (2021)	Hadrosauridae	Saurolophini	Prosaurolophus maximus	Dinosaur Park	3112.35	3.11235e+06	6.49309	N
	Imputed Stegoceras validum from Benson et al. (2017)	Madzia et al. (2021)	Pachycephalosauria	Pachycephalosaurinae	Foraminacephale brevis	Dinosaur Park	16.1432	16143.2	4.20799	N
	Brown et al. (2013b)	Madzia et al. (2021)	Pachycephalosauria	Pachycephalosauridae	Hanssuesia sternbergi	Dinosaur Park	40	40000	4.60206	N
	Imputed Stegoceras validum from Benson et al. (2017)	Madzia et al. (2021)	Pachycephalosauria	Pachycephalosauridae	Pachycephalosauridae n. sp.	Dinosaur Park	16.1432	16143.2	4.20799	N
	Benson et al. (2017)	Madzia et al. (2021)	Pachycephalosauria	Pachycephalosauridae	Stegoceras validum	Dinosaur Park	16.1432	16143.2	4.20799	N
	Imputed Orodromeus makelai from Benson et al. (2017)	Madzia et al. (2021)	Neornithischia	Orodrominae	Orodrominae sp. indet.	Dinosaur Park	19.6632	19663.2	4.29365	N
	Benson et al. (2017)	Madzia et al. (2021)	Ankylosauria	Ankylosaurini	Ankylosaurus magniventris	Hell Creek	4780.74	4.78074e+06	6.6795	N
	Benson et al. (2014)	Madzia et al. (2021)	Ankylosauria	Panoplosaurini	Denversaurus schlessmani	Hell Creek	2256.75	2.25675e+06	6.35348	N
	Benson et al. (2017)	Madzia et al. (2021)	Neoceratopsia	Leptoceratopsidae	Leptoceratops gracilis	Hell Creek	416.195	416195	5.6193	N
May be Triceratops horridus. From upper third.	Imputed average sheep mass from Holtz (2007)	Maidment and Barrett (2011)	Ceratopsidae	Chasmosaurinae	Tatankaceratops sacrisonorum	Hell Creek	100	100000	5	Y
May be adult morph of Triceratops horridus	Benson et al. (2017)	Madzia et al. (2021)	Ceratopsidae	Triceratopsini	Torosaurus latus	Hell Creek	9658.96	9658961	6.98493	N
largest mass given for Triceratops horridus	Benson et al. (2017)	Madzia et al. (2021)	Ceratopsidae	Triceratopsini	Triceratops horridus	Hell Creek	11398.4	11398421	7.05684	N
	Benson et al. (2017)	Madzia et al. (2021)	Ceratopsidae	Triceratopsini	Triceratops prorsus	Hell Creek	11393.7	1.13937e+07	7.05666	N
	Benson et al. (2017)	Madzia et al. (2021)	Hadrosauridae	Edmontosaurini	Edmontosaurus annectens	Hell Creek	6610.08	6.61008e+06	6.82021	N
May be young Pachycephalosaurus wyomingensis	Imputed average wolf mass from Holtz (2007)	Madzia et al. (2021)	Pachycephalosauria	Pachycephalosaurini	Dracorex hogwartsia	Hell Creek	40	40000	4.60206	Y
	Benson et al. (2017)	Madzia et al. (2021)	Pachycephalosauria	Pachycephalosaurini	Pachycephalosaurus wyomingensis	Hell Creek	369.9	369900	5.56808	N
	Imputed Stegoceras valium from Benson et al. (2017)	Madzia et al. (2021)	Pachycephalosauria	Pachycephalosaurinae	Sphaerotholus buchholtzae	Hell Creek	16.1432	16143.2	4.20799	N
	Calculated using MASSTIMATE (Campione, 2019) based on femur circumference (=183 mm) from ROM Stygimoloch	Madzia et al. (2021)	Pachycephalosauria	Pachycephalosaurini	Stygimoloch spinifer	Hell Creek	338.255	338255	5.52924	Y
Possibly Thescelosaurus neglectus. Location in section is unknown.	Calculated using MASSTIMATE (Campione, 2019) based on femur circumference given in Anderson et al. (1985)	Madzia et al. (2021)	Neornithischia	Thescelosaurinae	Thescelosaurus garbanii	Hell Creek	325.574	325574	5.51265	Y
	Benson et al. (2017)	Madzia et al. (2021)	Neornithischia	Thescelosaurinae	Thescelosaurus neglectus	Hell Creek	338.505	338505	5.52957	N
	Benson et al. (2017)	Madzia et al. (2021)	Ankylosauria	Panoplosaurini	Edmontonia rugosidens	Two Medicine	1530.51	1.53051e+06	6.18483	N
	Used Euoplocephalus tutus from Benson et al. (2017)	Wiersma and Irmis (2018)	Ankylosauria	Ankylosauridae	Oohkotokia horneri	Two Medicine	2329.63	2.32963e+06	6.36729	N
	Benson et al. (2017)	Madzia et al. (2021)	Ceratopsidae	Centrosaurini	Styracosaurus albertensis	Two Medicine	4167.91	4.16791e+06	6.61992	N
	Benson et al. (2017)	Madzia et al. (2021)	Ceratopsidae	Pachyrostra	Achelousaurus horneri	Two Medicine	1571.71	1.57171e+06	6.19637	N
	Paul (2016)	Madzia et al. (2021)	Ceratopsidae	Pachyrhinosaurini	Einiosaurus procurvicornis	Two Medicine	1300	1300000	6.11394	N
	Used Styracosaurus albertensis from Benson et al. (2017)	Wilson et al. (2020)	Ceratopsidae	Centrosaurinae	Stellasaurus ancellae	Two Medicine	4167.91	4.16791e+06	6.61992	N
	Benson et al. (2017)	Madzia et al. (2021)	Neoceratopsia	Leptoceratopsidae	Cerasinops hodgskissi	Two Medicine	209.113	209113	5.32038	N
	Paul (2016)	Madzia et al. (2021)	Neoceratopsia	Leptoceratopsidae	Prenoceratops pieganensis	Two Medicine	20	20000	4.30103	N
	Paul (2016)	Madzia et al. (2021)	Hadrosauridae	Brachylophosaurini	Acristavus gagslarsoni	Two Medicine	3000	3000000	6.47712	N
	Benson et al. (2017)	Madzia et al. (2021)	Hadrosauridae	Lambeosaurini	Corythosaurus casuarius	Two Medicine	4361.68	4.36168e+06	6.63965	N
	Benson et al. (2017)	Madzia et al. (2021)	Hadrosauridae	Kritosaurini	Gryposaurus latidens	Two Medicine	4230.38	4.23038e+06	6.62638	N
	Benson et al. (2017)	Madzia et al. (2021)	Hadrosauridae	Brachylophosaurini	Maiasaura peeblesorum	Two Medicine	3656.37	3.65637e+06	6.56305	N
	Based on femur length scaling equation in Table 1 of Campione and Evans (2012); femur length (=1050 mm) from Farke et al. (2019) for MOR 549	Madzia et al. (2021)	Hadrosauridae	Lambeosaurini	Hypacrosaurus stebingeri	Two Medicine	4858.47	4.85847e+06	6.6865	N
	Benson et al. (2017)	Madzia et al. (2021)	Hadrosauridae	Saurolophini	Prosaurolophus maximus	Two Medicine	3112.35	3.11235e+06	6.49309	N
	Used Stegoceras validum from Benson et al. (2017)	Madzia et al. (2021)	Pachycephalosauria	Pachycephalosauridae	Pachycephalosauridae indet.	Two Medicine	16.1432	16143.2	4.20799	N
	Benson et al. (2017)	Madzia et al. (2021)	Neornithischia	Orodrominae	Orodromeus makelai	Two Medicine	19.6632	19663.2	4.29365	N
	Based on femur length scaling equation in Table 1 of Campione and Evans (2012); used femur length (=464 mm) from Wiersma and Irmis (2018)	Wiersma and Irmis (2018)	Ankylosauria	Ankylosauridae	Akainacephalus johnsoni	Kaiparowits	443.674	443674	5.64706	N
	Imputed Panoplosaurus mirus, Edmontonia rugosidens and Edmontonia longiceps from Benson et al. (2017)	Madzia et al. (2021)	Ankylosauria	Nodosauridae	Nodosauridae indet.	Kaiparowits	1720.03	1.72003e+06	6.23554	N
		Madzia et al. (2021)	Ceratopsidae	Chasmosaurinae	Kaiparowits chasmosaurine n. sp.	Kaiparowits				N
		Madzia et al. (2021)	Ceratopsidae	Centrosaurinae	Kaiparowits centrosaurine B n. gen. et sp.	Kaiparowits				N
	Paul (2016)	Madzia et al. (2021)	Ceratopsidae	Chasmosaurinae	Kosmoceratops richardsoni	Kaiparowits	1200	1200000	6.07918	N
	Paul (2016)	Madzia et al. (2021)	Ceratopsidae	Nasutoceratopsini	Nasutoceratops titusi	Kaiparowits	1500	1500000	6.17609	N
	Paul (2016)	Madzia et al. (2021)	Ceratopsidae	Chasmosaurinae	Utahceratops gettyi	Kaiparowits	2000	2000000	6.30103	N
	Imputed Gryposaurus notabilis and Gryposaurus latidens from Benson et al. (2017)	Madzia et al. (2021)	Hadrosauridae	Kritosaurini	Gryposaurus monumentensis	Kaiparowits	4270.98	4.27098e+06	6.63053	N
could simply be Gryposaurus monumentensis	Imputed Gryposaurus notabilis and Gryposaurus latidens from Benson et al. (2017)	Madzia et al. (2021)	Hadrosauridae	Kritosaurini	Gryposaurus sp.	Kaiparowits	4270.98	4.27098e+06	6.63053	Y
	Benson et al. (2017)	Madzia et al. (2021)	Hadrosauridae	Parasaurolophini	Parasaurolophus cyrtocristatus	Kaiparowits	4937.43	4.93743e+06	6.6935	N
	Used Stegoceras validum from Benson et al. (2017)	Madzia et al. (2021)	Pachycephalosauria	Pachycephalosauridae	Pachycephalosauridae indet.	Kaiparowits	16.1432	16143.2	4.20799	N
	Used Orodromeus makelai from Benson et al. (2017)	Madzia et al. (2021)	Ornithopoda	Ornithopoda	indet. basal ornithopod	Kaiparowits	19.6632	19663.2	4.29365	N
	Benson et al. (2017)	Mannion et al. (2019a)	Titanosauriformes	Titanosauria	Alamosaurus sp.	Aguja	35163.8	3.51638e+07	7.5461	N
	Benson et al. (2017)	Madzia et al. (2021)	Ankylosauria	Panoplosaurini	Panoplosaurus sp.	Aguja	1372.85	1.37285e+06	6.13762	N
	Imputed Edmontonia rugosidens and Edmontonia longiceps from Benson et al. (2017)	Madzia et al. (2021)	Ankylosauria	Panoplosaurini	Edmontonia sp.	Aguja	1893.63	1.89363e+06	6.27729	N
	Benson et al. (2017)	Madzia et al. (2021)	Ceratopsidae	Chasmosaurinae	Agujaceratops mariscalensis	Aguja	2622.83	2.62283e+06	6.41877	N
	Based on femur length scaling equation in Table 1 of Campione and Evans (2012); femur length (=1020 mm) from Benson et al. (2017)	Madzia et al. (2021)	Ceratopsidae	Chasmosaurinae	Pentaceratops sp.	Aguja	4462.77	4.46277e+06	6.6496	N
	Used Nasutoceratops titusi from Paul (2016)	Dalman et al. (2021)	Ceratopsidae	Centrosaurinae	Yehuecauhceratops mudei	Aguja	1500	1500000	6.17609	N
		Longrich et al. (2021)	Hadrosauridae	Lambeosaurinae	Angulomastacator daviesi	Aguja				N
	Imputed Probactrosaurus mazongshanensis, Probactrosaurus gobiensis, Bactrosaurus johnsoni, and Claosaurus agilis from Benson et al. (2017)	Madzia et al. (2021)	Hadrosauridae	Hadrosauridae	Aquilarhinus palimentus	Aguja	1527.22	1.52722e+06	6.1839	N
	Used Stegoceras validum from Benson et al. (2017)	Longrich et al. (2010)	Pachycephalosauria	Pachycephalosauria	Texacephale langstoni	Aguja	16.1432	16143.2	4.20799	N
	Benson et al. (2017)	Mannion et al. (2019a)	Titanosauriformes	Titanosauria	Alamosaurus sanjuanensis	Kirtland	35163.8	3.51638e+07	7.5461	N
	Benson et al. (2017)	Madzia et al. (2021)	Ankylosauria	Ankylosauridae	Ahshislepelta minor	Kirtland	820.065	820065	5.91385	N
	Used Ankylosaurus magniventris from Benson et al. (2017)	Madzia et al. (2021)	Ankylosauria	Ankylosaurini	Ankylosaurus sp.	Kirtland	4780.74	4.78074e+06	6.6795	N
		Madzia et al. (2021)	Ankylosauria	Ankylosauria	Glyptodontopelta mimus	Kirtland				Y
	Paul (2016)	Madzia et al. (2021)	Ankylosauria	Ankylosaurini	Nodocephalosaurus kirtlandensis	Kirtland	1500	1500000	6.17609	N
	Paul (2016)	Madzia et al. (2021)	Ankylosauria	Ankylosaurini	Ziapelta sanjuanensis	Kirtland	2000	2000000	6.30103	N
phylogenetically treated as Centrosaurus apertus given Monoclonius may be a junior synonym	Used Centrosaurus apertus from Benson et al. (2017)	Madzia et al. (2021)	Ceratopsidae	Centrosaurini	Monoclonius sp.	Kirtland	2492.64	2.49264e+06	6.39666	N
	Imputed Anchiceratops ornatus and Pentaceratops sternbergii from Benson et al. (2017)	Madzia et al. (2021)	Ceratopsidae	Chasmosaurinae	Navajoceratops sullivani	Kirtland	6880.07	6.88007e+06	6.83759	N
	Benson et al. (2017)	Madzia et al. (2021)	Ceratopsidae	Chasmosaurinae	Pentaceratops sternbergii	Kirtland	10802.1	1.08021e+07	7.03351	N
	Imputed Anchiceratops ornatus and Pentaceratops sternbergii from Benson et al. (2017)	Madzia et al. (2021)	Ceratopsidae	Chasmosaurinae	Terminocavus sealeyi	Kirtland	6880.07	6.88007e+06	6.83759	N
	Paul (2016)	Lucas and Sullivan (2006)	Hadrosauridae	Hadrosaurinae	Anasazisaurus horneri	Kirtland	2500	2500000	6.39794	N
	Based on femur length scaling equation in Table 1 of Campione and Evans (2012); femur length (=1045 mm) from Benson et al. (2017)	Madzia et al. (2021)	Hadrosauridae	Kritosaurini	Kritosaurus navajovius	Kirtland	4790.98	4.79098e+06	6.68042	N
	Imputed Gryposaurus notabilis and Gryposaurus latidens from Benson et al. (2017)	Madzia et al. (2021)	Hadrosauridae	Saurolophinae	Naashoibitosaurus ostromi	Kirtland	4270.98	4.27098e+06	6.63053	N
	Benson et al. (2017)	Madzia et al. (2021)	Hadrosauridae	Parasaurolophini	Parasaurolophus cyrtocristatus	Kirtland	4937.43	4.93743e+06	6.6935	N
	Imputed Parasaurolophus cyrtocristatus and Parasaurolophus walkeri from Benson et al. (2017)	Madzia et al. (2021)	Hadrosauridae	Parasaurolophini	Parasaurolophus tubicen	Kirtland	5027.5	5.0275e+06	6.70135	N
	Imputed Saurolophus angustirostris and Saurolophus osborni from Benson et al. (2017)	Madzia et al. (2021)	Hadrosauridae	Saurolophini	Saurolophus sp.	Kirtland	6078.27	6.07827e+06	6.78378	N
	Used Prenocephale prenes from Benson et al. (2017)	Madzia et al. (2021)	Pachycephalosauria	Pachycephalosaurinae	Prenocephale sp.	Kirtland	62.5187	62518.7	4.79601	N
may be subadult animal	Imputed Stegoceras validum from Benson et al. (2017)	Madzia et al. (2021)	Pachycephalosauria	Pachycephalosaurinae	Sphaerotholus goodwini	Kirtland	16.1432	16143.2	4.20799	Y
	Used Stegoceras validum from Benson et al. (2017)	Madzia et al. (2021)	Pachycephalosauria	Pachycephalosauridae	Stegoceras novomexicanum	Kirtland	16.1432	16143.2	4.20799	N
	Imputed Euoplocephalus tutus from Benson et al. (2017)	Madzia et al. (2021)	Ankylosauria	Ankylosaurini	Anodontosaurus lambei	Horseshoe Canyon	2329.63	2.32963e+06	6.36729	N
	Benson et al. (2017)	Madzia et al. (2021)	Ankylosauria	Panoplosaurini	Edmontonia longiceps	Horseshoe Canyon	2256.75	2.25675e+06	6.35348	N
	Benson et al. (2017)	Madzia et al. (2021)	Ceratopsidae	Pachyrhinosaurini	Pachyrhinosaurus canadensis	Horseshoe Canyon	4439.84	4.43984e+06	6.64737	N
	Paul (2016)	Madzia et al. (2021)	Ceratopsidae	Triceratopsini	Eotriceratops xerinsularis	Horseshoe Canyon	9000	9000000	6.95424	N
	Benson et al. (2017)	Madzia et al. (2021)	Ceratopsidae	Chasmosaurinae	Anchiceratops ornatus	Horseshoe Canyon	2958.03	2.95803e+06	6.471	N
	Vice and Sullivan (2019)	Madzia et al. (2021)	Ceratopsidae	Chasmosaurinae	Arrhinoceratops brachyops	Horseshoe Canyon	987	987000	5.99432	N
	Benson et al. (2017)	Madzia et al. (2021)	Neoceratopsia	Leptoceratopsidae	Montanoceratops cerorhynchus	Horseshoe Canyon	187.6	187600	5.27323	N
	Benson et al. (2017)	Madzia et al. (2021)	Hadrosauridae	Edmontosaurini	Edmontosaurus regalis	Horseshoe Canyon	7586.5	7.5865e+06	6.88004	N
	Benson et al. (2017)	Madzia et al. (2021)	Hadrosauridae	Saurolophini	Saurolophus osborni	Horseshoe Canyon	6638.71	6.63871e+06	6.82208	N
	Benson et al. (2017)	Madzia et al. (2021)	Hadrosauridae	Lambeosaurini	Hypacrosaurus altispinus	Horseshoe Canyon	3689.15	3.68915e+06	6.56693	N
may be subadult animal	Used Stegoceras validum from Benson et al. (2017)	Madzia et al. (2021)	Pachycephalosauria	Pachycephalosaurinae	Sphaerotholus sp.	Horseshoe Canyon	16.1432	16143.2	4.20799	N
	Used Stegoceras validum from Benson et al. (2017)	Madzia et al. (2021)	Pachycephalosauria	Pachycephalosauridae	cf. Colepiocephale sp	Horseshoe Canyon	16.1432	16143.2	4.20799	N
	Benson et al. (2017)	Madzia et al. (2021)	Neornithischia	Thescelosaurinae	Parksosaurus warreni	Horseshoe Canyon	69.7113	69711.3	4.8433	N
	Benson et al. (2017)	Madzia et al. (2021)	Ankylosauria	Ankylosaurini	Ankylosaurus magniventris	Lance	4780.74	4.78074e+06	6.6795	N
	Benson et al. (2017)	Madzia et al. (2021)	Ankylosauria	Panoplosaurini	Edmontonia longiceps	Lance	2256.75	2.25675e+06	6.35348	N
May be adult morph of Triceratops horridus	Benson et al. (2017)	Madzia et al. (2021)	Ceratopsidae	Triceratopsini	Torosaurus latus	Lance	9658.96	9658961	6.98493	Y
largest mass given for Triceratops horridus	Benson et al. (2017)	Madzia et al. (2021)	Ceratopsidae	Triceratopsini	Triceratops horridus	Lance	11398.4	11398421	7.05684	N
	Benson et al. (2017)	Madzia et al. (2021)	Ceratopsidae	Triceratopsini	Triceratops prorsus	Lance	11393.7	1.13937e+07	7.05666	N
	Benson et al. (2017)	Madzia et al. (2021)	Hadrosauridae	Edmontosaurini	Edmontosaurus annectens	Lance	6610.08	6.61008e+06	6.82021	N
		Madzia et al. (2021)	Hadrosauridae	Lambeosaurinae	Lambeosaurinae indet.	Lance				N
	Benson et al. (2017)	Madzia et al. (2021)	Pachycephalosauria	Pachycephalosaurini	Pachycephalosaurus wyomingensis	Lance	369.9	369900	5.56808	N
	Benson et al. (2017)	Madzia et al. (2021)	Neornithischia	Thescelosaurinae	Thescelosaurus neglectus	Lance	338.505	338505	5.52957	N
	Benson et al. (2017)	Mannion et al. (2019a)	Titanosauriformes	Titanosauria	Alamosaurus sanjuanensis	Ojo Alamo	35163.8	3.51638e+07	7.5461	N
	Imputed Euoplocephalus tutus from Benson et al. (2017)	Madzia et al. (2021)	Ankylosauria	Ankylosauridae	Ankylosauridae indet.	Ojo Alamo	2329.63	2.32963e+06	6.36729	N
	Imputed Edmontonia rugosidens and Edmontonia longiceps from Benson et al. (2017)	Burns (2008)	Ankylosauria	Nodosauridae	Glyptodontopelta mimus	Ojo Alamo	1893.63	1.89363e+06	6.27729	N
	Average of largest Triceratops horridus and Triceratops prorsus from Benson et al. (2017)	Madzia et al. (2021)	Ceratopsidae	Triceratopsini	Triceratops sp.	Ojo Alamo	11396.1	1.13961e+07	7.05675	N
May be included under Eotriceratops	Paul (2016)	Madzia et al. (2021)	Ceratopsidae	Triceratopsini	Ojoceratops fowleri	Ojo Alamo	10000	10000000	7	Y
	Imputed Corythosaurus spp. From Benson et al. (2017)	Madzia et al. (2021)	Hadrosauridae	Lambeosaurinae	Lambeosaurinae indet.	Ojo Alamo	3908.67	3.90867e+06	6.59203	N
	Molina-Pérez et al. (2020)	Mannion et al. (2019b)	Titanosauriformes	Titanosauria	Quaesitosaurus orientalis	Barungoyat	26000	26000000	7.41497	N
	Benson et al. (2017)	Madzia et al. (2021)	Ankylosauria	Ankylosaurinae	Saichania chulsanensis	Barungoyat	611.972	611972	5.78673	N
According to Arbour et al. (2014) often confused with Saichania chulsanensis	Used Saichania chulsanensis from Benson et al. (2017)	Madzia et al. (2021)	Ankylosauria	Ankylosaurinae	Tarchia kielanae	Barungoyat	611.972	611972	5.78673	N
	Benson et al. (2017)	Madzia et al. (2021)	Neoceratopsia	Protoceratopsidae	Bagaceratops rozhdestvenskyi	Barungoyat	5.66534	5665.34	3.75323	N
	Used Bagaceratops rozhdestvenskyi from Benson et al. (2017)	Czepiński (2020)	Neoceratopsia	Protoceratopsidae	Breviceratops kozlowskii	Barungoyat	5.66534	5665.34	3.75323	N
Comparable in size to Stegoceras validum according to Maryanska and Osmolska	Used Stegoceras validum from Benson et al. (2017)	Madzia et al. (2021)	Pachycephalosauria	Pachycephalosaurinae	Tylocephale gilmorei	Barungoyat	16.1432	16143.2	4.20799	N
Comparable in size to Homalocephale and Prenocephale by Maryanska and Osmolska	Imputed Homalocephale calathocercos and Prenocephale prenes from Benson et al. (2017)	Madzia et al. (2021)	Pachycephalosauria	Pachycephalosaurinae	Goyocephale lattimorei	Barungoyat	50.5125	50512.5	4.7034	N
	Molina-Pérez et al. (2020)	Mannion et al. (2019b)	Titanosauriformes	Titanosauria	Sonidosaurus saihangaobiensis	Iren Dabasu	33000	33000000	7.51851	N
	Benson et al. (2017)	Madzia et al. (2021)	Ankylosauria	Ankylosaurini	Talarurus plicatospineus	Iren Dabasu	810.691	810691	5.90886	N
	Benson et al. (2017)	Madzia et al. (2021)	Hadrosauromorpha	Hadrosauromorpha	Bactrosaurus johnsoni	Iren Dabasu	1797.34	1.79734e+06	6.25463	N
	Benson et al. (2017)	Madzia et al. (2021)	Hadrosauromorpha	Hadrosauromorpha	Gilmoreosaurus mongoliensis	Iren Dabasu	1298.28	1.29828e+06	6.11337	N

## Sheet: STable5
Supplementary Data Table S5: Time distributions and location information for formations from Supplementary Data Table S4 used in Figure _.
Reference(s) for location and time duration	Formation	Location	time bin	fine time bin	upper time period	lower time period
Wang et al. (2018)	Shaximiao	China	Middle Jurassic	bin1	Callovian	Aalenian
Maidment and Muzworthy (2019)	Morrison	North America	Late Jurassic	bin1	Tithonian	Kimmeridgian
Bussert et al. (2009)	Tendaguru	Tanzania	Jurassic-Cretaceous	bin1	Hauterivian	Oxfordian
Zhong et al. (2021)	Yixian	China	Early Cretaceous	bin3	Aptian	Barremian
Joeckel et al. (2020); Tucker et al. (2020)	Cedar Mountain	North America	Early Cretaceous	bin3	Cenomanian	Berriasian
Averianov and Sues (2017)	Iren Dabasu	Mongolia	Late Cretaceous	bin4	Santonian	Turonian
Dashzeveg et al. (2005)	Djadokhta	Mongolia	Late Cretaceous	bin4	Campanian	Santonian
Fowler (2017)	Dinosaur Park	North America	Late Cretaceous	bin5	Campanian	Campanian
Fowler (2017)	Kaiparowits	North America	Late Cretaceous	bin5	Campanian	Campanian
Fowler (2017)	Aguja	North America	Late Cretaceous	bin5	Campanian	Campanian
Fowler (2017)	Kirtland	North America	Late Cretaceous	bin5	Campanian	Campanian
Fowler (2017)	Two Medicine	North America	Late Cretaceous	bin5	Maastrichtian	Campanian
Fowler (2017)	Horseshoe Canyon	North America	Late Cretaceous	bin5	Maastrichtian	Campanian
Averianov and Sues (2017)	Barungoyat	Mongolia	Late Cretaceous	bin5	Maastrichtian	Campanian
Park et al. (2021)	Nemegt	Mongolia	Late Cretaceous	bin5	Maastrichtian	Campanian
Fowler (2017)	Ojo Alamo	North America	Late Cretaceous	bin6	Maastrichtian	Maastrichtian
Fowler (2017)	Lance	North America	Late Cretaceous	bin6	Maastrichtian	Maastrichtian
Fowler (2017)	Hell Creek	North America	Late Cretaceous	bin6	Maastrichtian	Maastrichtian

## Sheet: References S1-S3
References for Supplementary Tables 1, 2 and 3.
Arbour VM, Burns ME, Sullivan RM, Lucas SG, Cantrell AK, Fry J, Suazo TL. 2014. A New Ankylosaurid Dinosaur from the Upper Cretaceous (Kirtlandian) of New Mexico with Implications for Ankylosaurid Diversity in the Upper Cretaceous of Western North America. PLoS ONE 9:e108804. DOI: 10.1371/journal.pone.0108804.
Arbour VM, Currie PJ. 2013. Euoplocephalus tutus and the Diversity of Ankylosaurid Dinosaurs in the Late Cretaceous of Alberta, Canada, and Montana, USA. PLoS ONE 8:e62421. DOI: 10.1371/journal.pone.0062421.
Arbour VM, Currie PJ. 2016. Systematics, phylogeny and palaeobiogeography of the ankylosaurid dinosaurs. Journal of Systematic Palaeontology 14:385–444. DOI: 10.1080/14772019.2015.1059985.
Arbour VM, Currie PJ, Badamgarav D. 2014. The ankylosaurid dinosaurs of the Upper Cretaceous Baruungoyot and Nemegt formations of Mongolia: Ankylosaurids from Mongolia. Zoological Journal of the Linnean Society 172:631–652. DOI: 10.1111/zoj.12185.
Arbour VM, Evans DC. 2017. A new ankylosaurine dinosaur from the Judith River Formation of Montana, USA, based on an exceptional skeleton with soft tissue preservation. Royal Society Open Science 4:161086. DOI: 10.1098/rsos.161086.
Arbour VM, Mallon JC. 2017. Unusual cranial and postcranial anatomy in the archetypal ankylosaur Ankylosaurus magniventris. FACETS 2:764–794. DOI: 10.1139/facets-2017-0063.
Barrett PM, Butler RJ, Xiao-Lin W, Xing X. 2009. Cranial Anatomy of the Iguanodontoid Ornithopod Jinzhousaurus yangi from the Lower Cretaceous Yixian Formation of China. Acta Palaeontologica Polonica 54:35–48. DOI: 10.4202/app.2009.0105.
Button DJ, Barrett PM, Rayfield EJ. 2016. Comparative cranial myology and biomechanics of Plateosaurus and Camarasaurus and evolution of the sauropod feeding apparatus. Palaeontology 59:887–913. DOI: 10.1111/pala.12266.
Campione NE, Evans DC. 2011. Cranial Growth and Variation in Edmontosaurs (Dinosauria: Hadrosauridae): Implications for Latest Cretaceous Megaherbivore Diversity in North America. PLoS ONE 6:e25186. DOI: 10.1371/journal.pone.0025186.
Carnegie Quarry. 2020. #Sauropodocember SOL 28 An Apatosaurian Apotheosis. We continue the Parade of Carnegie Quarry Sauropod Skulls, coming to the rarest of the rare. Available at https://www.facebook.com/login/?next=https%3A%2F%2Fwww.facebook.com%2Fcarnegiequarry%2Fphotos%2Fa.744361695667679%2F3217240748379749%2F (accessed January 23, 2022).
Carpenter K. 2013. History, Sedimentology, and Taphonomy of the Carnegie Quarry, Dinosaur National Monument, Utah. Annals of Carnegie Museum 81:153–232. DOI: 10.2992/007.081.0301.
Carpenter K, Hayashi S, Kobayashi Y, Maryańska T, Barsbold R, Sato K, Obata I. 2011. Saichania chulsanensis (Ornithischia, Ankylosauridae) from the Upper Cretaceous of Mongolia. Palaeontographica Abteilung A:1–61. DOI: 10.1127/pala/294/2011/1.
Carpenter K, Lamanna MC. 2015. The Braincase Assigned to the Ornithopod Dinosaur Uteodon McDonald, 2011, Reassigned to Dryosaurus Marsh, 1894: Implications for Iguanodontian Morphology and Taxonomy. Annals of Carnegie Museum 83:149–165. DOI: 10.2992/007.083.0201.
Chure D, Britt BB, Whitlock JA, Wilson JA. 2010. First complete sauropod dinosaur skull from the Cretaceous of the Americas and the evolution of sauropod dentition. Naturwissenschaften 97:379–391. DOI: 10.1007/s00114-010-0650-6.
Dompierre H, Churcher CS. 1996. Premaxillary shape as an indicator of the diet of seven extinct late Cenozoic new world camels. Journal of Vertebrate Paleontology 16:141–148. DOI: 10.1080/02724634.1996.10011292.
Forster CA. 1996. Species resolution in Triceratops : cladistic and morphometric approaches. Journal of Vertebrate Paleontology 16:259–270. DOI: 10.1080/02724634.1996.10011313.
Gates TA, Sampson SD. 2007. A new species of Gryposaurus (Dinosauria: Hadrosauridae) from the late Campanian Kaiparowits Formation, southern Utah, USA. Zoological Journal of the Linnean Society 151:351–376. DOI: 10.1111/j.1096-3642.2007.00349.x.
Gates TA, Tsogtbaatar K, Zanno LE, Chinzorig T, Watabe M. 2018. A new iguanodontian (Dinosauria: Ornithopoda) from the Early Cretaceous of Mongolia. PeerJ 6:e5300. DOI: 10.7717/peerj.5300.
Hatcher JB, Marsh OC, Lull RS. 1907. The Ceratopsia.
Head JJ. 1998. A new species of basal hadrosaurid (Dinosauria, Ornithischia) from the Cenomanian of Texas. Journal of Vertebrate Paleontology 18:718–738. DOI: 10.1080/02724634.1998.10011101.
Kilbourne B, Carpenter K. 2005. Redescription of Gargoyleosaurus parkpinorum, a polacanthid ankylosaur from the Upper Jurassic of Albany County, Wyoming. Neues Jahrbuch für Geologie und Paläontologie - Abhandlungen 235:111–160. DOI: 10.1127/njgpa/235/2005/111.
Kinneer B, Carpenter K, Shaw A. 2016. Redescription of Gastonia burgei (Dinosauria: Ankylosauria, Polacanthidae), and description of a new species. Neues Jahrbuch für Geologie und Paläontologie - Abhandlungen 282:37–80. DOI: 10.1127/njgpa/2016/0605.
Lee Y-N. 1996. A new nodosaurid ankylosaur (Dinosauria: Ornithischia) from the Paw Paw Formation (Late Albian) of Texas. Journal of Vertebrate Paleontology 16:232–245. DOI: 10.1080/02724634.1996.10011311.
Lull RS, Wright NE. 1942. Hadrosaurian Dinosaurs of North America. DOI: 10.1130/SPE40-p1.
MacLaren JA, Anderson PSL, Barrett PM, Rayfield EJ. 2017. Herbivorous dinosaur jaw disparity and its relationship to extrinsic evolutionary drivers. Paleobiology 43:15–33. DOI: 10.1017/pab.2016.31.
Madsen JH, McIntosh JS, Berman DS. 1995. Skull and atlas-axis complex of the Upper Jurassic sauropod Camarasaurus Cope (Reptilia: Saurischia). Pittsburgh: Carnegie Museum of Natural History.
Mallon JC, Anderson JS. 2013. Skull Ecomorphology of Megaherbivorous Dinosaurs from the Dinosaur Park Formation (Upper Campanian) of Alberta, Canada. PLoS ONE 8:e67182. DOI: 10.1371/journal.pone.0067182.
Martínez RDF, Lamanna MC, Novas FE, Ridgely RC, Casal GA, Martínez JE, Vita JR, Witmer LM. 2016. A Basal Lithostrotian Titanosaur (Dinosauria: Sauropoda) with a Complete Skull: Implications for the Evolution and Paleobiology of Titanosauria. PLOS ONE 11:e0151661. DOI: 10.1371/journal.pone.0151661.
McDonald AT, Bird J, Kirkland JI, Dodson P. 2012. Osteology of the Basal Hadrosauroid Eolambia caroljonesa (Dinosauria: Ornithopoda) from the Cedar Mountain Formation of Utah. PLoS ONE 7:e45712. DOI: 10.1371/journal.pone.0045712.
Mcdonald AT, Espílez E, Mampel L, Kirkland JI, Alcalá L. 2012. An unusual new basal iguanodont (Dinosauria: Ornithopoda) from the Lower Cretaceous of Teruel, Spain. Zootaxa 3595:61. DOI: 10.11646/zootaxa.3595.1.3.
Norman DB. 1998. On Asian ornithopods (Dinosauria: Ornithischia). 3. A new species of iguanodontid dinosaur. Zoological Journal of the Linnean Society 122:291–348. DOI: 10.1111/j.1096-3642.1998.tb02533.x.
Ősi A, Prondvai E, Mallon J, Bodor ER. 2017. Diversity and convergences in the evolution of feeding adaptations in ankylosaurs (Dinosauria: Ornithischia). Historical Biology 29:539–570. DOI: 10.1080/08912963.2016.1208194.
Park J-Y, Lee Y-N, Currie PJ, Kobayashi Y, Koppelhus E, Barsbold R, Mateus O, Lee S, Kim S-H. 2020. Additional skulls of Talarurus plicatospineus (Dinosauria: Ankylosauridae) and implications for paleobiogeography and paleoecology of armored dinosaurs. Cretaceous Research 108:104340. DOI: 10.1016/j.cretres.2019.104340.
Park J-Y, Lee Y-N, Kobayashi Y, Jacobs LL, Barsbold R, Lee H-J, Kim N, Song K-Y, Polcyn MJ. 2021. A new ankylosaurid from the Upper Cretaceous Nemegt Formation of Mongolia and implications for paleoecology of armoured dinosaurs. Scientific Reports 11:22928. DOI: 10.1038/s41598-021-02273-4.
Parsons WL, Parsons KM. 2009. A new ankylosaur (Dinosauria: Ankylosauria) from the Lower Cretaceous Cloverly Formation of central Montana. Canadian Journal of Earth Sciences 46:721–738. DOI: 10.1139/E09-045.
Poropat SF, Kear BP. 2013. Photographic Atlas and Three-Dimensional Reconstruction of the Holotype Skull of Euhelopus zdanskyi with Description of Additional Cranial Elements. PLoS ONE 8:e79932. DOI: 10.1371/journal.pone.0079932.
Prieto-Márquez A, Erickson GM, Ebersole JA. 2016. Anatomy and osteohistology of the basal hadrosaurid dinosaur Eotrachodon from the uppermost Santonian (Cretaceous) of southern Appalachia. PeerJ 4:e1872. DOI: 10.7717/peerj.1872.
Saitta E. 2014. Paleobiology of North American stegosaurs: Evidence for sexual dimorphism. unpublished Ph.D. thesis Thesis. Princeton: Princeton University.
Smithsonian National Museum of Natural History.Paleobiology Collections Search. Available at https://collections.nmnh.si.edu/search/paleo/ (accessed January 23, 2022).
Sullivan C, Xu X. 2017. Morphological Diversity and Evolution of the Jugal in Dinosaurs: diversity of the jugal in dinosaurs. The Anatomical Record 300:30–48. DOI: 10.1002/ar.23488.
Tennant J. 2013. Osteology of a Near-Complete Skeleton of Tenontosaurus tilletti (Dinosauria: Ornithopoda) from the Cloverly Formation, Montana, USA. M.Sc. thesis Thesis. Manchester: University of Manchester.
Thomas D. 2015. The cranial anatomy of Tenontosaurus tilletti Ostrom, 1970 (Dinosauria, Ornithopoda). Palaeontologia Electronica. DOI: 10.26879/450.
Tschopp E, Mateus O. 2013. The skull and neck of a new flagellicaudatan sauropod from the Morrison Formation and its implication for the evolution and ontogeny of diplodocid dinosaurs. Journal of Systematic Palaeontology 11:853–888. DOI: 10.1080/14772019.2012.746589.
Tschopp E, Mateus O. 2017. Osteology of Galeamopus pabsti sp. nov. (Sauropoda: Diplodocidae), with implications for neurocentral closure timing, and the cervico-dorsal transition in diplodocids. PeerJ 5:e3179. DOI: 10.7717/peerj.3179.
Tsogtbaatar K, Weishampel DB, Evans DC, Watabe M. 2014. A new Hadrosauroid (plesiohadros djadokhtaensis) from the late cretaceous djadokhtan fauna of southern Mongolia. Hadrosaurs:108–135.
Vickaryous MK, Russell AP, Currie PJ, Zhao X-J. 2011. A new ankylosaurid (Dinosauria: Ankylosauria) from the Lower Cretaceous of China, with comments on ankylosaurian relationships. Canadian Journal of Earth Sciences. DOI: 10.1139/e01-051.
Wang X, Pan R, Butler RJ, Barrett PM. 2010. The postcranial skeleton of the iguanodontian ornithopod Jinzhousaurus yangi from the Lower Cretaceous Yixian Formation of western Liaoning, China. Earth and Environmental Science Transactions of the Royal Society of Edinburgh 101:135–159. DOI: 10.1017/S1755691010009266.
Wang X, Xu X. 2001. A new iguanodontid (Jinzhousaurus yangi gen. et sp. nov.) from the Yixian Formation of western Liaoning, China. Chinese Science Bulletin 46:1669–1672. DOI: 10.1007/BF02900633.
Whitlock JA, Wilson JA, Lamanna MC. 2010. Description of a nearly complete juvenile skull of Diplodocus (Sauropoda: Diplodocoidea) from the Late Jurassic of North America. Journal of Vertebrate Paleontology 30:442–457. DOI: 10.1080/02724631003617647.
Wilson JA. 2005. Redescription of the mongolian sauropod nemegtosaurus mongoliensis nowinski (dinosauria: Saurischia) and comments on late cretaceous sauropod diversity. Journal of Systematic Palaeontology 3:283–318. DOI: 10.1017/S1477201905001628.
Winkler DA, Murry PA, Jacobs LL. 1997. A new species of Tenontosaurus (Dinosauria: Ornithopoda) from the Early Cretaceous of Texas. Journal of Vertebrate Paleontology 17:330–348. DOI: 10.1080/02724634.1997.10010978.
Witmer Lab. 2019.Collection Types. Available at https://www.witmerlab.com/collection-types (accessed January 23, 2022).
Woodruff DC, Foster JR. 2017. The first specimen of Camarasaurus (Dinosauria: Sauropoda) from Montana: The northernmost occurrence of the genus. PLOS ONE 12:e0177423. DOI: 10.1371/journal.pone.0177423.
Yang J, You H, Xie L, Zhou H. 2017. A New Specimen of Crichtonpelta benxiensis (Dinosauria: Ankylosaurinae) from the Mid-Cretaceous of Liaoning Province, China. Acta Geologica Sinica - English Edition 91:781–790. DOI: 10.1111/1755-6724.13308.
You H, Li D, Liu W. 2011. A New Hadrosauriform Dinosaur from the Early Cretaceous of Gansu Province, China. Acta Geologica Sinica - English Edition 85:51–57. DOI: 10.1111/j.1755-6724.2011.00377.x.
You H, Luo Z, Shubin NH, Witmer LM, Tang Z, Tang F. 2003. The earliest-known duck-billed dinosaur from deposits of late Early Cretaceous age in northwest China and hadrosaur evolution. Cretaceous Research 24:347–355. DOI: 10.1016/S0195-6671(03)00048-X.
Zaher H, Pol D, Carvalho AB, Nascimento PM, Riccomini C, Larson P, Juarez-Valieri R, Pires-Domingues R, da Silva NJ, de Almeida Campos D. 2011. A Complete Skull of an Early Cretaceous Sauropod and the Evolution of Advanced Titanosaurians. PLoS ONE 6:e16663. DOI: 10.1371/journal.pone.0016663.

## Sheet: References S4-S5
References for Supplementary Tables 4 and 5.
Anderson JF, Hall‐Martin A, Russell DA. 1985. Long‐bone circumference and weight in mammals, birds and dinosaurs. Journal of Zoology 207:53–61. DOI: 10.1111/j.1469-7998.1985.tb04915.x.
Arbour VM, Currie PJ, Badamgarav D. 2014. The ankylosaurid dinosaurs of the Upper Cretaceous Baruungoyot and Nemegt formations of Mongolia: Ankylosaurids from Mongolia. Zoological Journal of the Linnean Society 172:631–652. DOI: 10.1111/zoj.12185.
Arbour VM, Evans DC. A new ankylosaurine dinosaur from the Judith River Formation of Montana, USA, based on an exceptional skeleton with soft tissue preservation. Royal Society Open Science 4:161086. DOI: 10.1098/rsos.161086.
Averianov A, Sues H-D. 2017. Review of Cretaceous sauropod dinosaurs from Central Asia. Cretaceous Research 69:184–197. DOI: 10.1016/j.cretres.2016.09.006.
Benson RBJ, Campione NE, Carrano MT, Mannion PD, Sullivan C, Upchurch P, Evans DC. 2014. Rates of Dinosaur Body Mass Evolution Indicate 170 Million Years of Sustained Ecological Innovation on the Avian Stem Lineage. PLoS Biology 12:e1001853. DOI: 10.1371/journal.pbio.1001853.
Benson RBJ, Hunt G, Carrano MT, Campione N. 2017. Cope’s rule and the adaptive landscape of dinosaur body size evolution. Palaeontology 61:13–48. DOI: 10.1111/pala.12329.
Brown CM, Evans DC, Campione NE, O’Brien LJ, Eberth DA. 2013. Evidence for taphonomic size bias in the Dinosaur Park Formation (Campanian, Alberta), a model Mesozoic terrestrial alluvial‐paralic system. Palaeogeography, Palaeoclimatology, Palaeoecology 372:108–122. DOI: 10.1016/j.palaeo.2012.06.027.
Burns ME. 2008. Taxonomic utility of ankylosaur (Dinosauria, Ornithischia) osteoderms: Glyptodontopelta mimus Ford, 2000: a test case. Journal of Vertebrate Paleontology 28:1102–1109. DOI: 10.1671/0272-4634-28.4.1102.
Bussert R, Heinrich W-D, Aberhan M. 2009. The Tendaguru Formation (Late Jurassic to Early Cretaceous, southern Tanzania): definition, palaeoenvironments, and sequence stratigraphy. Fossil Record 12:141–174. DOI: 10.1002/mmng.200900004.
Campbell JA. 2015. A reassessment of the horned dinosaur Judiceratops tigris (Ornithischia: Ceratopsidae) from the Upper Cretaceous (Campanian) of Montana, USA. Canadian Journal of Earth Sciences 52:85–95. DOI: 10.1139/cjes-2014-0172.
Campione NE, Evans DC. 2012. A universal scaling relationship between body mass and proximal limb bone dimensions in quadrupedal terrestrial tetrapods. BMC Biology 10:60. DOI: 10.1186/1741-7007-10-60.
Campione NE. 2020. MASSTIMATE: Body Mass Estimation Equations for Vertebrates.
Carpenter K. 2018. Maraapunisaurus fragillimus, N.G. (formerly Amphicoelias fragillimus), a basal Rebbachisaurid from the Morrison Formation (Upper Jurassic) of Colorado. Geology of the Intermountain West 5:227–244. DOI: 10.31711/giw.v5.pp227-244.
Czepiński Ł. 2020. Ontogeny and variation of a protoceratopsid dinosaur Bagaceratops rozhdestvenskyi from the Late Cretaceous of the Gobi Desert. Historical Biology 32:1394–1421.
Dalman SG, Lucas SG, Jasinski SE, Lichtig AJ, Dodson P. 2021. The oldest centrosaurine: a new ceratopsid dinosaur (Dinosauria: Ceratopsidae) from the Allison Member of the Menefee Formation (Upper Cretaceous, early Campanian), northwestern New Mexico, USA. PalZ 95:291–335. DOI: 10.1007/s12542-021-00555-w.
Dashzeveg D, Dingus L, Loope DB, Swisher CC, Dulam T, Sweeney MR. 2005. New Stratigraphic Subdivision, Depositional Environment, and Age Estimate for the Upper Cretaceous Djadokhta Formation, Southern Ulan Nur Basin, Mongolia. American Museum Novitates 2005:1–31. DOI: 10.1206/0003-0082(2005)498[0001:NSSDEA]2.0.CO;2.
Farke A, Wedel M, Taylor M. 2019.The Open Dinosaur Project. Available at https://opendino.wordpress.com/ (accessed February 6, 2022).
Farlow JO, Coroian ID, Foster JR. 2010. Giants on the landscape: modelling the abundance of megaherbivorous dinosaurs of the Morrison Formation (Late Jurassic, western USA). Historical Biology 22:403–429. DOI: 10.1080/08912961003787598.
Fowler DW. 2017. Revised geochronology, correlation, and dinosaur stratigraphic ranges of the Santonian-Maastrichtian (Late Cretaceous) formations of the Western Interior of North America. PLOS ONE 12:e0188426. DOI: 10.1371/journal.pone.0188426.
Gunga H-C, Kirsch K, Rittweger J, Röcker L, Clarke A, Albertz J, Wiedemann A, Mokry S, Suthau T, Wehr A, Heinrich W-D, Schultze H-P. 1999. Body size and body volume distribution in two sauropods from the Upper Jurassic of Tendaguru (Tanzania). Fossil Record 2:91–102. DOI: 10.1002/mmng.1999.4860020106.
Hao B, Zhang Q, Peng G, Ye Y, You H. 2018. Redescription of Gigantspinosaurus sichuanensis (Dinosauria, Stegosauria) from the Late Jurassic of Sichuan, Southwestern China. Acta Geologica Sinica - English Edition 92:431–441. DOI: 10.1111/1755-6724.13535.
Holtz TR. 2007.Dinosaurs. Available at https://www.geol.umd.edu/~tholtz/dinoappendix/HoltzappendixWinter2011.pdf (accessed August 1, 2020).
Joeckel RM, Ludvigson GA, Möller A, Hotton CL, Suarez MB, Suarez CA, Sames B, Kirkland JI, Hendrix B. 2020. Chronostratigraphy and terrestrial palaeoclimatology of Berriasian–Hauterivian strata of the Cedar Mountain Formation, Utah, USA. Geological Society, London, Special Publications 498:75–100. DOI: 10.1144/SP498-2018-133.
Li K, Yang C, Hu F. 2011. Dinosaur assemblages from the Middle Jurassic Shaximiao Formation and Chuanjie Formation in the Sichuan-Yunnan Basin, China. Volumina Jurassica Vol. 9:21–42.
Longrich NR. 2010. The function of large eyes in Protoceratops: a nocturnal ceratopsian. In: Ryan MJ, Chinnery-Allgeier BJ, Eberth DA eds. In New perspectives on horned dinosaurs: The Royal Tyrrell Museum Ceratopsian Symposium. IN: Indiana University Press, 308–327.
Longrich NR, Sankey J, Tanke D. 2010. Texacephale langstoni, a new genus of pachycephalosaurid (Dinosauria: Ornithischia) from the upper Campanian Aguja Formation, southern Texas, USA. Cretaceous Research 31:274–284. DOI: 10.1016/j.cretres.2009.12.002.
Longrich NR, Suberbiola XP, Pyron RA, Jalil N-E. 2021. The first duckbill dinosaur (Hadrosauridae: Lambeosaurinae) from Africa and the role of oceanic dispersal in dinosaur biogeography. Cretaceous Research 120:104678. DOI: 10.1016/j.cretres.2020.104678.
Lucas SG, Sullivan RM. 2006. Late Cretaceous Vertebrates from the Western Interior: Bulletin 35. New Mexico Museum of Natural History and Science.
Madzia D, Arbour VM, Boyd CA, Farke AA, Cruzado-Caballero P, Evans DC. 2021. The phylogenetic nomenclature of ornithischian dinosaurs. PeerJ 9:e12362. DOI: 10.7717/peerj.12362.
Maidment SCR, Barrett PM. 2011. A new specimen of Chasmosaurus belli (Ornithischia: Ceratopsidae), a revision of the genus, and the utility of postcrania in the taxonomy and systematics of ceratopsid dinosaurs. Zootaxa 2963:1–47.
Maidment SCR, Muxworthy A. 2019. A chronostratigraphic framework for the Upper Jurassic Morrison Formation, western U.S.A. Journal of Sedimentary Research 89:1017–1038. DOI: 10.2110/jsr.2019.54.
Mallon JC. 2019. Competition structured a Late Cretaceous megaherbivorous dinosaur assemblage. Scientific Reports 9:15447. DOI: 10.1038/s41598-019-51709-5.
Mannion PD, Upchurch P, Jin X, Zheng W. 2019a. New information on the Cretaceous sauropod dinosaurs of Zhejiang Province, China: impact on Laurasian titanosauriform phylogeny and biogeography. Royal Society Open Science 6:191057. DOI: 10.1098/rsos.191057.
Mannion PD, Upchurch P, Schwarz D, Wings O. 2019b. Taxonomic affinities of the putative titanosaurs from the Late Jurassic Tendaguru Formation of Tanzania: phylogenetic and biogeographic implications for eusauropod dinosaur evolution. Zoological Journal of the Linnean Society 185:784–909. DOI: 10.1093/zoolinnean/zly068.
Mazzetta GV, Christiansen P, Fariña RA. 2004. Giants and Bizarres: Body Size of Some Southern South American Cretaceous Dinosaurs. Historical Biology 16:71–83. DOI: 10.1080/08912960410001715132.
Molina-Pérez R, Larramendi A. 2020. Dinosaur Facts and Figures: The Sauropods and Other Sauropodomorphs. Princeton University Press.
Molina-Pérez R, Larramendi A, Connolly D, Cruz GÁR. 2019. Dinosaur Facts and Figures: The Theropods and Other Dinosauriformes. Princeton University Press.
O’Gorman EJ, Hone DWE. 2012. Body Size Distribution of the Dinosaurs. PLoS ONE 7:e51925. DOI: 10.1371/journal.pone.0051925.
Park J-Y, Lee Y-N, Kobayashi Y, Jacobs LL, Barsbold R, Lee H-J, Kim N, Song K-Y, Polcyn MJ. 2021. A new ankylosaurid from the Upper Cretaceous Nemegt Formation of Mongolia and implications for paleoecology of armoured dinosaurs. Scientific Reports 11:22928. DOI: 10.1038/s41598-021-02273-4.
Paul GS. 2016. The Princeton Field Guide to Dinosaurs: Second Edition. Princeton University Press.
Prieto-Márquez A. 2011. A reapprisal of Barsboldia sicinskii (Dinosauria: Hadrosauridae) from the Late Cretaceous of Mongolia. Journal of Paleontology 85:468–477. DOI: 10.1666/10-106.1.
Tsogotbaatar K, Weishampel DB, Evans DC, Watabe M. 2014. A new hadrosauroid Plesiohadros djadokhtaensis) from the Late Cretaceous Djadokhtan Fauna of southern Mongolia. In: Eberth DA, Evans DC eds. Hadrosaurs. IN: Indiana University Press, 108–135.
Tucker RT, Zanno LE, Huang H-Q, Makovicky PJ. 2020. A refined temporal framework for newly discovered fossil assemblages of the upper Cedar Mountain Formation (Mussentuchit Member), Mussentuchit Wash, Central Utah. Cretaceous Research 110:104384. DOI: 10.1016/j.cretres.2020.104384.
Vice RM, Sullivan C. 2019. Ontogenetic change in humeri of the ceratopsian dinosaur Pachyrhinosaurus lakustai. In: 7th Annual Meeting Canadian Society of Vertebrate Palaeontology. Grande Prairie, Alberta, 52.
Wang J, Ye Y, Pei R, Tian Y, Feng C, Zheng D, Chang S-C. 2018. Age of Jurassic basal sauropods in Sichuan, China: A reappraisal of basal sauropod evolution. GSA Bulletin 130:1493–1500. DOI: 10.1130/B31910.1.
Wiersma JP, Irmis RB. 2018. A new southern Laramidian ankylosaurid, Akainacephalus johnsoni gen. et sp. nov., from the upper Campanian Kaiparowits Formation of southern Utah, USA. PeerJ 6:e5016. DOI: 10.7717/peerj.5016.
Wilson JP, Ryan MJ, Evans DC. 2020. A new, transitional centrosaurine ceratopsid from the Upper Cretaceous Two Medicine Formation of Montana and the evolution of the ‘Styracosaurus-line’ dinosaurs. Royal Society Open Science 7:200284. DOI: 10.1098/rsos.200284.
Zhong Y, Huyskens MH, Yin Q-Z, Wang Y, Ma Q, Xu Y-G. 2021. High-precision geochronological constraints on the duration of ‘Dinosaur Pompeii’ and the Yixian Formation. National Science Review 8:nwab063. DOI: 10.1093/nsr/nwab063.
Zhou C, Wu W, Sekiya T, Dong Z. 2018. A new titanosauriformes dinosaur from Jehol Biota of western Liaoning,China. Global Geology 37:327–333.
